# Supplementary material
Source: HighWire-hosted journal article supplement (https://jcp.bmj.com/content/jcp-2022-208483)
Supplement: inline-supplementary-material-1 [file inline-supplementary-material-1.xlsx]

## Sheet: Sheet1
		Recalled	Background	Recalled_PC	Background_PC	Inferred_Retention_Weight
T-7100A	M-54700	1	0	1.5	0.5	1
T-C1000	M-99623	1	0	1.5	0.5	1
T-28000	M-91741	1	0	1.5	0.5	1
T-57000	M-73330	1	0	1.5	0.5	1
T-71000	F-CC300	1	0	1.5	0.5	1
T-7100A	M-54001	1	0	1.5	0.5	1
	M-50000	6	1	6.5	1.5	1
	M-40000	1	0	1.5	0.5	1
	M-15500	1	0	1.5	0.5	1
T-1A000	M-91501	1	0	1.5	0.5	1
T-7100A	M-00110	11	0	11.5	0.5	1
	M-00100	1	0	1.5	0.5	1
T-71000	M-90100	1	0	1.5	0.5	1
T-62000	D6-50200	1	1	1.5	1.5	1
T-28000	M-89303	1	0	1.5	0.5	1
	M-88153	1	0	1.5	0.5	1
T-62000	D5-80500	1	0	1.5	0.5	1
T-59300	M-82411	1	1	1.5	1.5	1
T-65000	M-82463	1	1	1.5	1.5	1
T-83400	T-83400	2	2	2.5	2.5	1
T-58200	M-95903	1	1	1.5	1.5	1
T-81000	M-85403	1	0	1.5	0.5	1
T-28000	M-80463	1	0	1.5	0.5	1
T-71000	M-50001	1	0	1.5	0.5	1
T-C8000	M-85800	1	0	1.5	0.5	1
T-D2700	M-80106	1	0	1.5	0.5	1
T-57000	M-89363	2	0	2.5	0.5	1
T-D3050	M-80103	1	0	1.5	0.5	1
T-71000	M-00110	4	0	4.5	0.5	1
	F-CC340	1	0	1.5	0.5	1
T-C4000	M-00110	1	1	1.5	1.5	1
T-57000	M-83601	1	0	1.5	0.5	1
T-D6500	M-88903	1	0	1.5	0.5	1
T-11711	M-50000	1	0	1.5	0.5	1
T01000	M8110	1	0	1.5	0.5	1
T-54000	M-43000	1	0	1.5	0.5	1
T-56350	M-81403	1	1	1.5	1.5	1
T-B6000	M-85103	2	2	2.5	2.5	1
T-D4400	M-89363	1	0	1.5	0.5	1
T-58000	M-89363	2	0	2.5	0.5	1
T-D4400	M-88500	1	0	1.5	0.5	1
T-AA910	M-95903	1	1	1.5	1.5	1
T-D4600	M-84423	1	1	1.5	1.5	1
T-59000	M-82463	1	0	1.5	0.5	1
T-87020	M-90713	1	0	1.5	0.5	1
T-59300	M-89363	1	0	1.5	0.5	1
T-C5000	M-09010	1	0	1.5	0.5	1
T-87000	M-86310	1	0	1.5	0.5	1
T-58000	M-82411	3	3	3.5	3.5	1
T-B6000	M-40000	1	2	1.5	2.5	0.6
T-01000	M-88400	1	2	1.5	2.5	0.6
T-28000	M-82403	1	2	1.5	2.5	0.6
T-11500	M-81403	1	2	1.5	2.5	0.6
T-71200	M-43000	1	2	1.5	2.5	0.6
T-28000	M-95903	2	4	2.5	4.5	0.555556
T-71000	M-50000	2	5	2.5	5.5	0.454545
T-C4000	M-82463	1	3	1.5	3.5	0.428571
T-02104	M-72750	1	3	1.5	3.5	0.428571
T-81000	M-44020	1	3	1.5	3.5	0.428571
T-61000	M-89400	1	3	1.5	3.5	0.428571
T-58200	M-82411	1	3	1.5	3.5	0.428571
T-83000	M-84613	0	1	0.5	1.5	0.333333
T-83040	M-76800	0	1	0.5	1.5	0.333333
T-83020	M-76800	0	1	0.5	1.5	0.333333
T-83000	M-76540	0	1	0.5	1.5	0.333333
	M-81900	0	1	0.5	1.5	0.333333
	M-83000	0	1	0.5	1.5	0.333333
	M-80900	0	1	0.5	1.5	0.333333
	M-90000	0	1	0.5	1.5	0.333333
T-83010	M-76500	0	1	0.5	1.5	0.333333
T-83000	M-76801	0	1	0.5	1.5	0.333333
	R0	0	1	0.5	1.5	0.333333
	M-78800	0	1	0.5	1.5	0.333333
T-83020	D8-00190	0	1	0.5	1.5	0.333333
T-83000	M-79380	0	1	0.5	1.5	0.333333
	M-79510	0	1	0.5	1.5	0.333333
	M-82100	0	1	0.5	1.5	0.333333
	P1-0C010	0	1	0.5	1.5	0.333333
	M-33000	0	1	0.5	1.5	0.333333
	M-76000	0	1	0.5	1.5	0.333333
T-81000	M-87423	0	1	0.5	1.5	0.333333
	M-83803	0	1	0.5	1.5	0.333333
	M-82003	0	1	0.5	1.5	0.333333
	M-80943	0	1	0.5	1.5	0.333333
	M-80513	0	1	0.5	1.5	0.333333
	M-80413	0	1	0.5	1.5	0.333333
	M-80000	0	1	0.5	1.5	0.333333
	M-78000	0	1	0.5	1.5	0.333333
	M-74470	0	1	0.5	1.5	0.333333
	M-67012	0	1	0.5	1.5	0.333333
	M-44000	0	1	0.5	1.5	0.333333
	M-24600	0	1	0.5	1.5	0.333333
	M-09010	0	1	0.5	1.5	0.333333
	M-00000	0	1	0.5	1.5	0.333333
	F-41800	0	1	0.5	1.5	0.333333
	DE-32A10	0	1	0.5	1.5	0.333333
	D4-40500	0	1	0.5	1.5	0.333333
	D0-70110	0	1	0.5	1.5	0.333333
	M-87203	0	1	0.5	1.5	0.333333
	M-87600	0	1	0.5	1.5	0.333333
T-83000	M-72600	0	1	0.5	1.5	0.333333
T-81000	M-91410	0	1	0.5	1.5	0.333333
T-83000	M-67060	0	1	0.5	1.5	0.333333
	M-54000	0	1	0.5	1.5	0.333333
	M-39210	0	1	0.5	1.5	0.333333
	M-36500	0	1	0.5	1.5	0.333333
	M-33440	0	1	0.5	1.5	0.333333
	M-09420	0	1	0.5	1.5	0.333333
	D8-00110	0	1	0.5	1.5	0.333333
	D7-75630	0	1	0.5	1.5	0.333333
	D7-75130	0	1	0.5	1.5	0.333333
	D7-71232	0	1	0.5	1.5	0.333333
T-81210	M-33400	0	1	0.5	1.5	0.333333
T-81200	M-84400	0	1	0.5	1.5	0.333333
	M-33410	0	1	0.5	1.5	0.333333
T-81020	M-76540	0	1	0.5	1.5	0.333333
	M-40000	0	1	0.5	1.5	0.333333
	M-04013	0	1	0.5	1.5	0.333333
T-81010	M-76810	0	1	0.5	1.5	0.333333
T-83090	M-79360	0	1	0.5	1.5	0.333333
T-83200	M-67000	0	1	0.5	1.5	0.333333
	D0-40200	0	1	0.5	1.5	0.333333
T-83400	M-79200	0	1	0.5	1.5	0.333333
	M-87800	0	1	0.5	1.5	0.333333
	M-87600	0	1	0.5	1.5	0.333333
	M-87500	0	1	0.5	1.5	0.333333
	M-85900	0	1	0.5	1.5	0.333333
	M-84603	0	1	0.5	1.5	0.333333
	M-84410	0	1	0.5	1.5	0.333333
	M-82100	0	1	0.5	1.5	0.333333
	M-79960	0	1	0.5	1.5	0.333333
	M-78000	0	1	0.5	1.5	0.333333
T-83200	D7-75620	0	1	0.5	1.5	0.333333
T-83400	M-76830	0	1	0.5	1.5	0.333333
	M-74800	0	1	0.5	1.5	0.333333
	M-74001	0	1	0.5	1.5	0.333333
	M-73400	0	1	0.5	1.5	0.333333
	M-72120	0	1	0.5	1.5	0.333333
	M-72060	0	1	0.5	1.5	0.333333
	M-68020	0	1	0.5	1.5	0.333333
	M-38000	0	1	0.5	1.5	0.333333
	M-88100	0	1	0.5	1.5	0.333333
	M-88211	0	1	0.5	1.5	0.333333
	M-89320	0	1	0.5	1.5	0.333333
T-83600	M-72005	0	1	0.5	1.5	0.333333
T-87000	M-80706	0	1	0.5	1.5	0.333333
	M-80006	0	1	0.5	1.5	0.333333
	M-79600	0	1	0.5	1.5	0.333333
	M-78001	0	1	0.5	1.5	0.333333
	M-76810	0	1	0.5	1.5	0.333333
	M-76000	0	1	0.5	1.5	0.333333
	M-57500	0	1	0.5	1.5	0.333333
	M-45020	0	1	0.5	1.5	0.333333
	M-44140	0	1	0.5	1.5	0.333333
	M-34000	0	1	0.5	1.5	0.333333
	M-33430	0	1	0.5	1.5	0.333333
	M-00001	0	1	0.5	1.5	0.333333
	D7-75920	0	1	0.5	1.5	0.333333
	D7-71420	0	1	0.5	1.5	0.333333
T-83600	M-88300	0	1	0.5	1.5	0.333333
	M-79360	0	1	0.5	1.5	0.333333
	M-79320	0	1	0.5	1.5	0.333333
T-83400	M-37000	0	1	0.5	1.5	0.333333
	M-33201	0	1	0.5	1.5	0.333333
	M-09070	0	1	0.5	1.5	0.333333
T-83200	M-79510	0	1	0.5	1.5	0.333333
	M-78290	0	1	0.5	1.5	0.333333
	M-76820	0	1	0.5	1.5	0.333333
	M-76000	0	1	0.5	1.5	0.333333
	M-74005	0	1	0.5	1.5	0.333333
	M-72160	0	1	0.5	1.5	0.333333
	M-71003	0	1	0.5	1.5	0.333333
	M-67060	0	1	0.5	1.5	0.333333
	M-67036	0	1	0.5	1.5	0.333333
T-81000	D0-10160	0	1	0.5	1.5	0.333333
T-83200	M-54010	0	1	0.5	1.5	0.333333
	M-40500	0	1	0.5	1.5	0.333333
	M-38350	0	1	0.5	1.5	0.333333
	M-01000	0	1	0.5	1.5	0.333333
	M-00001	0	1	0.5	1.5	0.333333
	G-A632	0	1	0.5	1.5	0.333333
	G-A497	0	1	0.5	1.5	0.333333
	D7-75920	0	1	0.5	1.5	0.333333
	M-79460	0	1	0.5	1.5	0.333333
	M-79800	0	1	0.5	1.5	0.333333
T-83400	G-A402	0	1	0.5	1.5	0.333333
T-83200	M-80003	0	1	0.5	1.5	0.333333
T-83400	F-81030	0	1	0.5	1.5	0.333333
	D8-02004	0	1	0.5	1.5	0.333333
	D7-75600	0	1	0.5	1.5	0.333333
T-83240	M-81402	0	1	0.5	1.5	0.333333
	M-43000	0	1	0.5	1.5	0.333333
	M-40002	0	1	0.5	1.5	0.333333
	M-09000	0	1	0.5	1.5	0.333333
	G-A497	0	1	0.5	1.5	0.333333
T-83210	M-67090	0	1	0.5	1.5	0.333333
	D7-75780	0	1	0.5	1.5	0.333333
T-83200	T-88900	0	1	0.5	1.5	0.333333
	R0	0	1	0.5	1.5	0.333333
	M-91200	0	1	0.5	1.5	0.333333
	M-90840	0	1	0.5	1.5	0.333333
	M-90520	0	1	0.5	1.5	0.333333
	M-82100	0	1	0.5	1.5	0.333333
	M-80763	0	1	0.5	1.5	0.333333
T-81000	D0-52110	0	1	0.5	1.5	0.333333
T-75000	M-80703	0	1	0.5	1.5	0.333333
T-81000	D0-00501	0	1	0.5	1.5	0.333333
T-61210	M-43000	0	1	0.5	1.5	0.333333
T-61200	M-09010	0	1	0.5	1.5	0.333333
	M-01000	0	1	0.5	1.5	0.333333
T-61110	M-95913	0	1	0.5	1.5	0.333333
T-61100	M-88500	0	1	0.5	1.5	0.333333
	M-80106	0	1	0.5	1.5	0.333333
	M-09300	0	1	0.5	1.5	0.333333
	M-01000	0	1	0.5	1.5	0.333333
	M-00100	0	1	0.5	1.5	0.333333
	D5-21404	0	1	0.5	1.5	0.333333
T-61000	M-95903	0	1	0.5	1.5	0.333333
	M-72000	0	1	0.5	1.5	0.333333
	M-33400	0	1	0.5	1.5	0.333333
	D5-20240	0	1	0.5	1.5	0.333333
	D5-20220	0	1	0.5	1.5	0.333333
T-60610	M-81403	0	1	0.5	1.5	0.333333
	M-09460	0	1	0.5	1.5	0.333333
T-60000	M-40000	0	1	0.5	1.5	0.333333
T-59990	M-67090	0	1	0.5	1.5	0.333333
	M-67016	0	1	0.5	1.5	0.333333
T-61200	M-40000	0	1	0.5	1.5	0.333333
T-61300	D5-20220	0	1	0.5	1.5	0.333333
T-59990	M-42000	0	1	0.5	1.5	0.333333
T-61300	M-00110	0	1	0.5	1.5	0.333333
T-63000	M-67060	0	1	0.5	1.5	0.333333
	M-54600	0	1	0.5	1.5	0.333333
	M-09100	0	1	0.5	1.5	0.333333
	M-09000	0	1	0.5	1.5	0.333333
T-62093	M-43000	0	1	0.5	1.5	0.333333
T-62000	M-91200	0	1	0.5	1.5	0.333333
	M-88000	0	1	0.5	1.5	0.333333
	M-78020	0	1	0.5	1.5	0.333333
	M-73330	0	1	0.5	1.5	0.333333
	M-72030	0	1	0.5	1.5	0.333333
	M-67000	0	1	0.5	1.5	0.333333
	M-41610	0	1	0.5	1.5	0.333333
	M-33430	0	1	0.5	1.5	0.333333
	M-10000	0	1	0.5	1.5	0.333333
T-61400	M-09410	0	1	0.5	1.5	0.333333
	D1-10250	0	1	0.5	1.5	0.333333
T-61300	M-95903	0	1	0.5	1.5	0.333333
	M-80100	0	1	0.5	1.5	0.333333
	M-09010	0	1	0.5	1.5	0.333333
T-59990	M-44000	0	1	0.5	1.5	0.333333
T-59905	M-37000	0	1	0.5	1.5	0.333333
T-75210	M-33400	0	1	0.5	1.5	0.333333
T-59600	M-80500	0	1	0.5	1.5	0.333333
	M-76830	0	1	0.5	1.5	0.333333
	M-76801	0	1	0.5	1.5	0.333333
	M-76600	0	1	0.5	1.5	0.333333
	M-76000	0	1	0.5	1.5	0.333333
	M-73000	0	1	0.5	1.5	0.333333
	M-55100	0	1	0.5	1.5	0.333333
	M-41612	0	1	0.5	1.5	0.333333
	M-37000	0	1	0.5	1.5	0.333333
	M-09011	0	1	0.5	1.5	0.333333
	G-A568	0	1	0.5	1.5	0.333333
	F-39340	0	1	0.5	1.5	0.333333
	D6-94500	0	1	0.5	1.5	0.333333
	D5-409A2	0	1	0.5	1.5	0.333333
	D5-40990	0	1	0.5	1.5	0.333333
T-59470	M-73000	0	1	0.5	1.5	0.333333
	M-67000	0	1	0.5	1.5	0.333333
	M-43000	0	1	0.5	1.5	0.333333
	G-A001	0	1	0.5	1.5	0.333333
	D5-41210	0	1	0.5	1.5	0.333333
T-59600	M-76880	0	1	0.5	1.5	0.333333
	M-81402	0	1	0.5	1.5	0.333333
T-59900	M-87600	0	1	0.5	1.5	0.333333
T-59600	M-82103	0	1	0.5	1.5	0.333333
T-59900	M-87500	0	1	0.5	1.5	0.333333
	M-82630	0	1	0.5	1.5	0.333333
	M-82100	0	1	0.5	1.5	0.333333
	M-80520	0	1	0.5	1.5	0.333333
	M-76100	0	1	0.5	1.5	0.333333
	M-72850	0	1	0.5	1.5	0.333333
	M-67090	0	1	0.5	1.5	0.333333
	M-42100	0	1	0.5	1.5	0.333333
	M-40001	0	1	0.5	1.5	0.333333
	M-32200	0	1	0.5	1.5	0.333333
	M-09460	0	1	0.5	1.5	0.333333
	M-01560	0	1	0.5	1.5	0.333333
	L-35620	0	1	0.5	1.5	0.333333
	D3-87206	0	1	0.5	1.5	0.333333
T-59680	M-72042	0	1	0.5	1.5	0.333333
T-59600	M-95700	0	1	0.5	1.5	0.333333
	M-89300	0	1	0.5	1.5	0.333333
	M-88000	0	1	0.5	1.5	0.333333
	M-82463	0	1	0.5	1.5	0.333333
T-63000	M-72040	0	1	0.5	1.5	0.333333
	M-81406	0	1	0.5	1.5	0.333333
T-63650	M-40000	0	1	0.5	1.5	0.333333
T-74000	M-74001	0	1	0.5	1.5	0.333333
	M-72005	0	1	0.5	1.5	0.333333
	M-63000	0	1	0.5	1.5	0.333333
	M-50000	0	1	0.5	1.5	0.333333
	M-36301	0	1	0.5	1.5	0.333333
	M-35000	0	1	0.5	1.5	0.333333
	M-33800	0	1	0.5	1.5	0.333333
	M-33400	0	1	0.5	1.5	0.333333
	M-32700	0	1	0.5	1.5	0.333333
	M-20000	0	1	0.5	1.5	0.333333
	M-15500	0	1	0.5	1.5	0.333333
	M-09460	0	1	0.5	1.5	0.333333
	M-09150	0	1	0.5	1.5	0.333333
	G-A454	0	1	0.5	1.5	0.333333
T-73800	M-43000	0	1	0.5	1.5	0.333333
T-73020	M-81203	0	1	0.5	1.5	0.333333
T-73003	M-78000	0	1	0.5	1.5	0.333333
T-73000	M-81406	0	1	0.5	1.5	0.333333
	M-81402	0	1	0.5	1.5	0.333333
	M-42000	0	1	0.5	1.5	0.333333
T-74000	M-73320	0	1	0.5	1.5	0.333333
	M-80500	0	1	0.5	1.5	0.333333
T-64000	M-09000	0	1	0.5	1.5	0.333333
T-74000	M-81401	0	1	0.5	1.5	0.333333
T-75060	D7-23550	0	1	0.5	1.5	0.333333
T-75050	M-81403	0	1	0.5	1.5	0.333333
	M-80530	0	1	0.5	1.5	0.333333
	M-09350	0	1	0.5	1.5	0.333333
T-75000	M-92000	0	1	0.5	1.5	0.333333
	M-81200	0	1	0.5	1.5	0.333333
T-87000	M-82453	0	1	0.5	1.5	0.333333
T-75000	M-80530	0	1	0.5	1.5	0.333333
	M-80500	0	1	0.5	1.5	0.333333
	M-76500	0	1	0.5	1.5	0.333333
	M-74000	0	1	0.5	1.5	0.333333
	M-54010	0	1	0.5	1.5	0.333333
	M-54000	0	1	0.5	1.5	0.333333
	M-42000	0	1	0.5	1.5	0.333333
	M-09010	0	1	0.5	1.5	0.333333
	D0-70110	0	1	0.5	1.5	0.333333
T-74000	M-88003	0	1	0.5	1.5	0.333333
	M-83123	0	1	0.5	1.5	0.333333
	M-81402	0	1	0.5	1.5	0.333333
T-73000	M-32000	0	1	0.5	1.5	0.333333
T-71300	M-54001	0	1	0.5	1.5	0.333333
	M-33400	0	1	0.5	1.5	0.333333
	D7-12440	0	1	0.5	1.5	0.333333
T-71000	D7-11000	0	1	0.5	1.5	0.333333
	D0-00520	0	1	0.5	1.5	0.333333
T-65400	M-43000	0	1	0.5	1.5	0.333333
T-65000	M-88003	0	1	0.5	1.5	0.333333
	M-85500	0	1	0.5	1.5	0.333333
	M-84733	0	1	0.5	1.5	0.333333
	M-84410	0	1	0.5	1.5	0.333333
	M-81406	0	1	0.5	1.5	0.333333
	M-35000	0	1	0.5	1.5	0.333333
	M-33770	0	1	0.5	1.5	0.333333
	D5-90370	0	1	0.5	1.5	0.333333
	D5-30910	0	1	0.5	1.5	0.333333
T-64500	M-74000	0	1	0.5	1.5	0.333333
	M-38000	0	1	0.5	1.5	0.333333
	M-00100	0	1	0.5	1.5	0.333333
T-64400	M-43000	0	1	0.5	1.5	0.333333
	M-40000	0	1	0.5	1.5	0.333333
	M-09410	0	1	0.5	1.5	0.333333
T-64300	M-58200	0	1	0.5	1.5	0.333333
T-71000	D7-11050	0	1	0.5	1.5	0.333333
	D7-12150	0	1	0.5	1.5	0.333333
	D7-12180	0	1	0.5	1.5	0.333333
	M-80010	0	1	0.5	1.5	0.333333
T-71200	F-39340	0	1	0.5	1.5	0.333333
	D7-12380	0	1	0.5	1.5	0.333333
	D7-12200	0	1	0.5	1.5	0.333333
	D7-12190	0	1	0.5	1.5	0.333333
	D7-12180	0	1	0.5	1.5	0.333333
T-71050	M-81403	0	1	0.5	1.5	0.333333
T-71020	M-81203	0	1	0.5	1.5	0.333333
T-71000	M-81303	0	1	0.5	1.5	0.333333
	M-80001	0	1	0.5	1.5	0.333333
	D7-12383	0	1	0.5	1.5	0.333333
	M-75400	0	1	0.5	1.5	0.333333
	M-71040	0	1	0.5	1.5	0.333333
	M-71000	0	1	0.5	1.5	0.333333
	M-53350	0	1	0.5	1.5	0.333333
	M-09410	0	1	0.5	1.5	0.333333
	M-01000	0	1	0.5	1.5	0.333333
	DC-55160	0	1	0.5	1.5	0.333333
	D7-12601	0	1	0.5	1.5	0.333333
T-87000	M-82411	0	1	0.5	1.5	0.333333
T-87010	M-88100	0	1	0.5	1.5	0.333333
T-87000	M-83000	0	1	0.5	1.5	0.333333
T-01000	M-72042	0	1	0.5	1.5	0.333333
	M-90000	0	1	0.5	1.5	0.333333
	M-87250	0	1	0.5	1.5	0.333333
	M-87130	0	1	0.5	1.5	0.333333
	M-85623	0	1	0.5	1.5	0.333333
	M-85610	0	1	0.5	1.5	0.333333
	M-85503	0	1	0.5	1.5	0.333333
	M-84050	0	1	0.5	1.5	0.333333
	M-82600	0	1	0.5	1.5	0.333333
	M-81703	0	1	0.5	1.5	0.333333
	M-80953	0	1	0.5	1.5	0.333333
	M-80100	0	1	0.5	1.5	0.333333
	M-80013	0	1	0.5	1.5	0.333333
	M-80006	0	1	0.5	1.5	0.333333
	M-76850	0	1	0.5	1.5	0.333333
	M-76820	0	1	0.5	1.5	0.333333
	M-75000	0	1	0.5	1.5	0.333333
	M-73450	0	1	0.5	1.5	0.333333
	M-73300	0	1	0.5	1.5	0.333333
	M-72420	0	1	0.5	1.5	0.333333
	M-90500	0	1	0.5	1.5	0.333333
	M-90703	0	1	0.5	1.5	0.333333
	M-90833	0	1	0.5	1.5	0.333333
T-02100	M-84080	0	1	0.5	1.5	0.333333
T-02120	D0-22250	0	1	0.5	1.5	0.333333
T-02104	M-88500	0	1	0.5	1.5	0.333333
	M-87500	0	1	0.5	1.5	0.333333
	M-80703	0	1	0.5	1.5	0.333333
T-02102	M-87203	0	1	0.5	1.5	0.333333
	M-80812	0	1	0.5	1.5	0.333333
	M-33410	0	1	0.5	1.5	0.333333
	D0-22250	0	1	0.5	1.5	0.333333
T-02100	M-84040	0	1	0.5	1.5	0.333333
T-01000	M-96903	0	1	0.5	1.5	0.333333
T-02100	M-76600	0	1	0.5	1.5	0.333333
	M-41000	0	1	0.5	1.5	0.333333
T-01600	M-35060	0	1	0.5	1.5	0.333333
T-01000	MIC13	0	1	0.5	1.5	0.333333
	MIC12	0	1	0.5	1.5	0.333333
	M-98903	0	1	0.5	1.5	0.333333
	M-97401	0	1	0.5	1.5	0.333333
	M-97313	0	1	0.5	1.5	0.333333
	M-72090	0	1	0.5	1.5	0.333333
	M-72005	0	1	0.5	1.5	0.333333
T-87000	M-84613	0	1	0.5	1.5	0.333333
T-01000	M-67004	0	1	0.5	1.5	0.333333
	D6-90820	0	1	0.5	1.5	0.333333
T-29000	M-82403	0	1	0.5	1.5	0.333333
T-01000	D0-00547	0	1	0.5	1.5	0.333333
	D0-00528	0	1	0.5	1.5	0.333333
T-D6500	M-76500	0	1	0.5	1.5	0.333333
	M-33400	0	1	0.5	1.5	0.333333
T-D4600	M-96873	0	1	0.5	1.5	0.333333
	M-89300	0	1	0.5	1.5	0.333333
	M-84803	0	1	0.5	1.5	0.333333
	M-82413	0	1	0.5	1.5	0.333333
	M-80006	0	1	0.5	1.5	0.333333
	M-80003	0	1	0.5	1.5	0.333333
	M-78060	0	1	0.5	1.5	0.333333
	M-78000	0	1	0.5	1.5	0.333333
	M-67470	0	1	0.5	1.5	0.333333
	M-67060	0	1	0.5	1.5	0.333333
	M-54000	0	1	0.5	1.5	0.333333
	M-43000	0	1	0.5	1.5	0.333333
	M-37001	0	1	0.5	1.5	0.333333
T-01000	DA-75700	0	1	0.5	1.5	0.333333
	DE-12900	0	1	0.5	1.5	0.333333
	DE-A0400	0	1	0.5	1.5	0.333333
	M-33401	0	1	0.5	1.5	0.333333
	M-67002	0	1	0.5	1.5	0.333333
	M-61000	0	1	0.5	1.5	0.333333
	M-52110	0	1	0.5	1.5	0.333333
	M-43300	0	1	0.5	1.5	0.333333
	M-41600	0	1	0.5	1.5	0.333333
	M-41500	0	1	0.5	1.5	0.333333
	M-33501	0	1	0.5	1.5	0.333333
	M-33420	0	1	0.5	1.5	0.333333
	M-31510	0	1	0.5	1.5	0.333333
	F-50500	0	1	0.5	1.5	0.333333
	M-11220	0	1	0.5	1.5	0.333333
	M-10000	0	1	0.5	1.5	0.333333
	M-04013	0	1	0.5	1.5	0.333333
	M-03130	0	1	0.5	1.5	0.333333
	M-03000	0	1	0.5	1.5	0.333333
	M-00000	0	1	0.5	1.5	0.333333
	G-A648	0	1	0.5	1.5	0.333333
	F-CC110	0	1	0.5	1.5	0.333333
T-02120	M-09010	0	1	0.5	1.5	0.333333
	M-72200	0	1	0.5	1.5	0.333333
	M-78060	0	1	0.5	1.5	0.333333
	M-80003	0	1	0.5	1.5	0.333333
T-02850	M-87400	0	1	0.5	1.5	0.333333
	DE-31A10	0	1	0.5	1.5	0.333333
T-02842	M-72850	0	1	0.5	1.5	0.333333
T-02830	M-87400	0	1	0.5	1.5	0.333333
	M-87200	0	1	0.5	1.5	0.333333
	M-33430	0	1	0.5	1.5	0.333333
	M-33400	0	1	0.5	1.5	0.333333
	M-14364	0	1	0.5	1.5	0.333333
T-02820	M-87600	0	1	0.5	1.5	0.333333
	M-80520	0	1	0.5	1.5	0.333333
	M-72760	0	1	0.5	1.5	0.333333
T-02805	M-87500	0	1	0.5	1.5	0.333333
	M-87270	0	1	0.5	1.5	0.333333
	M-76810	0	1	0.5	1.5	0.333333
	M-33410	0	1	0.5	1.5	0.333333
	D0-40036	0	1	0.5	1.5	0.333333
T-02487	M-38000	0	1	0.5	1.5	0.333333
	M-09350	0	1	0.5	1.5	0.333333
	D4-40500	0	1	0.5	1.5	0.333333
T-02850	M-88320	0	1	0.5	1.5	0.333333
T-02870	M-33170	0	1	0.5	1.5	0.333333
	M-45020	0	1	0.5	1.5	0.333333
T-03000	M-80043	0	1	0.5	1.5	0.333333
T-04000	M-44140	0	1	0.5	1.5	0.333333
	M-14200	0	1	0.5	1.5	0.333333
T-03000	M-95900	0	1	0.5	1.5	0.333333
	M-92500	0	1	0.5	1.5	0.333333
	M-92200	0	1	0.5	1.5	0.333333
	M-92100	0	1	0.5	1.5	0.333333
	M-84040	0	1	0.5	1.5	0.333333
	M-80702	0	1	0.5	1.5	0.333333
	M-72750	0	1	0.5	1.5	0.333333
T-02870	M-80812	0	1	0.5	1.5	0.333333
T-03000	M-55070	0	1	0.5	1.5	0.333333
	M-43020	0	1	0.5	1.5	0.333333
	M-42100	0	1	0.5	1.5	0.333333
	M-35000	0	1	0.5	1.5	0.333333
	M-33620	0	1	0.5	1.5	0.333333
	M-00001	0	1	0.5	1.5	0.333333
	D1-50440	0	1	0.5	1.5	0.333333
	D0-01200	0	1	0.5	1.5	0.333333
T-02486	M-33401	0	1	0.5	1.5	0.333333
T-02485	M-78730	0	1	0.5	1.5	0.333333
T-02484	M-76810	0	1	0.5	1.5	0.333333
T-02140	M-87240	0	1	0.5	1.5	0.333333
T-02424	M-50140	0	1	0.5	1.5	0.333333
	M-33410	0	1	0.5	1.5	0.333333
	M-09011	0	1	0.5	1.5	0.333333
	D0-22210	0	1	0.5	1.5	0.333333
T-02420	M-33410	0	1	0.5	1.5	0.333333
	M-33400	0	1	0.5	1.5	0.333333
T-02400	M-87500	0	1	0.5	1.5	0.333333
T-02150	M-38000	0	1	0.5	1.5	0.333333
T-02140	M-80812	0	1	0.5	1.5	0.333333
T-02424	M-85003	0	1	0.5	1.5	0.333333
T-02140	M-40000	0	1	0.5	1.5	0.333333
	M-09300	0	1	0.5	1.5	0.333333
T-02130	M-84040	0	1	0.5	1.5	0.333333
	M-81400	0	1	0.5	1.5	0.333333
	M-75530	0	1	0.5	1.5	0.333333
	M-09350	0	1	0.5	1.5	0.333333
	M-01000	0	1	0.5	1.5	0.333333
	DA-75700	0	1	0.5	1.5	0.333333
T-02424	M-74100	0	1	0.5	1.5	0.333333
	M-87270	0	1	0.5	1.5	0.333333
T-02480	M-91210	0	1	0.5	1.5	0.333333
T-02460	M-76810	0	1	0.5	1.5	0.333333
T-02480	M-88320	0	1	0.5	1.5	0.333333
	M-88211	0	1	0.5	1.5	0.333333
	M-76600	0	1	0.5	1.5	0.333333
T-02471	M-91200	0	1	0.5	1.5	0.333333
	M-72750	0	1	0.5	1.5	0.333333
	M-09410	0	1	0.5	1.5	0.333333
T-02462	M-41610	0	1	0.5	1.5	0.333333
T-02460	M-87270	0	1	0.5	1.5	0.333333
	M-09350	0	1	0.5	1.5	0.333333
T-02424	M-87700	0	1	0.5	1.5	0.333333
T-02460	D0-75610	0	1	0.5	1.5	0.333333
T-02450	M-88900	0	1	0.5	1.5	0.333333
	M-81010	0	1	0.5	1.5	0.333333
	M-80943	0	1	0.5	1.5	0.333333
	DE-31A10	0	1	0.5	1.5	0.333333
T-02432	M-72750	0	1	0.5	1.5	0.333333
T-02431	M-09350	0	1	0.5	1.5	0.333333
T-02424	M-88320	0	1	0.5	1.5	0.333333
T-D4600	D5-60300	0	1	0.5	1.5	0.333333
T-D4400	M-88523	0	1	0.5	1.5	0.333333
	M-80103	0	1	0.5	1.5	0.333333
T-B6000	M-88500	0	1	0.5	1.5	0.333333
T-94020	D7-55111	0	1	0.5	1.5	0.333333
T-94010	M-90503	0	1	0.5	1.5	0.333333
	M-54730	0	1	0.5	1.5	0.333333
T-94000	M-91023	0	1	0.5	1.5	0.333333
	M-91003	0	1	0.5	1.5	0.333333
	M-90903	0	1	0.5	1.5	0.333333
	M-90600	0	1	0.5	1.5	0.333333
	M-81403	0	1	0.5	1.5	0.333333
	M-80103	0	1	0.5	1.5	0.333333
	M-80003	0	1	0.5	1.5	0.333333
	M-78800	0	1	0.5	1.5	0.333333
	M-78020	0	1	0.5	1.5	0.333333
	M-74003	0	1	0.5	1.5	0.333333
	M-55000	0	1	0.5	1.5	0.333333
	M-34150	0	1	0.5	1.5	0.333333
	F-39340	0	1	0.5	1.5	0.333333
	D7-75140	0	1	0.5	1.5	0.333333
T-71000	M-54000	1	4	1.5	4.5	0.333333
T-92100	M-72000	0	1	0.5	1.5	0.333333
T-94020	M-76890	0	1	0.5	1.5	0.333333
	M-90833	0	1	0.5	1.5	0.333333
T-94100	F-10240	0	1	0.5	1.5	0.333333
T-B6000	G-A639	0	1	0.5	1.5	0.333333
	M-82900	0	1	0.5	1.5	0.333333
	M-80500	0	1	0.5	1.5	0.333333
	M-67050	0	1	0.5	1.5	0.333333
	M-61100	0	1	0.5	1.5	0.333333
	M-54000	0	1	0.5	1.5	0.333333
	M-33401	0	1	0.5	1.5	0.333333
	M-32000	0	1	0.5	1.5	0.333333
	M-00110	0	1	0.5	1.5	0.333333
T-AA910	M-44000	0	1	0.5	1.5	0.333333
T-94400	M-33400	0	1	0.5	1.5	0.333333
T-AA910	D1-10250	0	1	0.5	1.5	0.333333
T-AA000	M-95400	0	1	0.5	1.5	0.333333
	M-87422	0	1	0.5	1.5	0.333333
	M-67000	0	1	0.5	1.5	0.333333
	M-55100	0	1	0.5	1.5	0.333333
T-94800	M-09350	0	1	0.5	1.5	0.333333
T-94400	M-72000	0	1	0.5	1.5	0.333333
	M-55400	0	1	0.5	1.5	0.333333
T-92000	M-91403	0	1	0.5	1.5	0.333333
	M-82403	0	1	0.5	1.5	0.333333
	M-81406	0	1	0.5	1.5	0.333333
T-87010	M-41610	0	1	0.5	1.5	0.333333
T-87020	M-09350	0	1	0.5	1.5	0.333333
	D8-02004	0	1	0.5	1.5	0.333333
	D7-75160	0	1	0.5	1.5	0.333333
T-59450	M-42000	0	1	0.5	1.5	0.333333
T-87010	M-84803	0	1	0.5	1.5	0.333333
	M-84723	0	1	0.5	1.5	0.333333
	M-83103	0	1	0.5	1.5	0.333333
	M-80703	0	1	0.5	1.5	0.333333
	M-09410	0	1	0.5	1.5	0.333333
T-87020	M-54700	0	1	0.5	1.5	0.333333
T-87000	M-88903	0	1	0.5	1.5	0.333333
	M-87203	0	1	0.5	1.5	0.333333
	M-86500	0	1	0.5	1.5	0.333333
	M-86231	0	1	0.5	1.5	0.333333
	M-86203	0	1	0.5	1.5	0.333333
	M-86100	0	1	0.5	1.5	0.333333
	M-85003	0	1	0.5	1.5	0.333333
	M-84800	0	1	0.5	1.5	0.333333
T-87020	M-33410	0	1	0.5	1.5	0.333333
	M-79690	0	1	0.5	1.5	0.333333
T-92000	M-80003	0	1	0.5	1.5	0.333333
T-87800	M-86501	0	1	0.5	1.5	0.333333
T-92000	M-79350	0	1	0.5	1.5	0.333333
	M-74005	0	1	0.5	1.5	0.333333
	M-74002	0	1	0.5	1.5	0.333333
	M-70000	0	1	0.5	1.5	0.333333
	M-67031	0	1	0.5	1.5	0.333333
	M-42100	0	1	0.5	1.5	0.333333
	M-01000	0	1	0.5	1.5	0.333333
T-87800	M-90800	0	1	0.5	1.5	0.333333
	M-84410	0	1	0.5	1.5	0.333333
T-87020	M-83103	0	1	0.5	1.5	0.333333
T-87800	M-81400	0	1	0.5	1.5	0.333333
	M-76540	0	1	0.5	1.5	0.333333
	M-76500	0	1	0.5	1.5	0.333333
	M-09410	0	1	0.5	1.5	0.333333
	M-00100	0	1	0.5	1.5	0.333333
	D7-72110	0	1	0.5	1.5	0.333333
T-87600	M-87600	0	1	0.5	1.5	0.333333
T-87020	M-84703	0	1	0.5	1.5	0.333333
T-B6000	M-87200	0	1	0.5	1.5	0.333333
	M-90540	0	1	0.5	1.5	0.333333
T-D4400	M-79320	0	1	0.5	1.5	0.333333
T-B6000	M-90840	0	1	0.5	1.5	0.333333
T-C5100	M-95900	0	1	0.5	1.5	0.333333
	M-80000	0	1	0.5	1.5	0.333333
	M-76810	0	1	0.5	1.5	0.333333
	M-51000	0	1	0.5	1.5	0.333333
	M-42100	0	1	0.5	1.5	0.333333
	G-A249	0	1	0.5	1.5	0.333333
T-C5000	M-80713	0	1	0.5	1.5	0.333333
	M-76800	0	1	0.5	1.5	0.333333
T-C4900	M-84413	0	1	0.5	1.5	0.333333
	M-82411	0	1	0.5	1.5	0.333333
	M-44000	0	1	0.5	1.5	0.333333
T-C4810	M-87203	0	1	0.5	1.5	0.333333
	M-84906	0	1	0.5	1.5	0.333333
	M-81406	0	1	0.5	1.5	0.333333
	M-72020	0	1	0.5	1.5	0.333333
T-C4710	M-95903	0	1	0.5	1.5	0.333333
T-C4700	M-95903	0	1	0.5	1.5	0.333333
	M-85003	0	1	0.5	1.5	0.333333
T-C4600	M-67000	0	1	0.5	1.5	0.333333
T-C5300	M-80702	0	1	0.5	1.5	0.333333
T-D2700	D4-40500	0	1	0.5	1.5	0.333333
	M-31500	0	1	0.5	1.5	0.333333
T-D2701	M-84060	0	1	0.5	1.5	0.333333
T-D4400	M-55000	0	1	0.5	1.5	0.333333
	M-44140	0	1	0.5	1.5	0.333333
	M-26000	0	1	0.5	1.5	0.333333
	D7-72106	0	1	0.5	1.5	0.333333
T-D3050	M-92203	0	1	0.5	1.5	0.333333
	M-88610	0	1	0.5	1.5	0.333333
	M-80009	0	1	0.5	1.5	0.333333
	M-74100	0	1	0.5	1.5	0.333333
T-D2701	M-81400	0	1	0.5	1.5	0.333333
T-D2700	M-44000	0	1	0.5	1.5	0.333333
T-D2701	M-80812	0	1	0.5	1.5	0.333333
	M-80703	0	1	0.5	1.5	0.333333
	M-43000	0	1	0.5	1.5	0.333333
	M-40000	0	1	0.5	1.5	0.333333
T-D2700	M-88900	0	1	0.5	1.5	0.333333
	M-80103	0	1	0.5	1.5	0.333333
	M-78000	0	1	0.5	1.5	0.333333
	M-74003	0	1	0.5	1.5	0.333333
T-C4360	M-81403	0	1	0.5	1.5	0.333333
T-C4200	M-80003	0	1	0.5	1.5	0.333333
T-C4100	M-09410	0	1	0.5	1.5	0.333333
T-C1000	M-43000	0	1	0.5	1.5	0.333333
	M-97100	0	1	0.5	1.5	0.333333
	M-96700	0	1	0.5	1.5	0.333333
	M-82463	0	1	0.5	1.5	0.333333
	M-81406	0	1	0.5	1.5	0.333333
	M-72850	0	1	0.5	1.5	0.333333
	M-72200	0	1	0.5	1.5	0.333333
	M-67050	0	1	0.5	1.5	0.333333
	M-43010	0	1	0.5	1.5	0.333333
	G-A111	0	1	0.5	1.5	0.333333
	M-98733	0	1	0.5	1.5	0.333333
	DC-13010	0	1	0.5	1.5	0.333333
	DC-11010	0	1	0.5	1.5	0.333333
	DC-10106	0	1	0.5	1.5	0.333333
	D6-31100	0	1	0.5	1.5	0.333333
T-B6200	M-72030	0	1	0.5	1.5	0.333333
T-B6100	M-09410	0	1	0.5	1.5	0.333333
T-B6050	M-81400	0	1	0.5	1.5	0.333333
T-B6000	M-92000	0	1	0.5	1.5	0.333333
T-C1000	M-98663	0	1	0.5	1.5	0.333333
	MAC1D	0	1	0.5	1.5	0.333333
T-C4000	P1-03100	0	1	0.5	1.5	0.333333
	M-85800	0	1	0.5	1.5	0.333333
	M-98903	0	1	0.5	1.5	0.333333
	M-97023	0	1	0.5	1.5	0.333333
	M-96873	0	1	0.5	1.5	0.333333
	M-96733	0	1	0.5	1.5	0.333333
	M-90613	0	1	0.5	1.5	0.333333
	M-90503	0	1	0.5	1.5	0.333333
	M-89413	0	1	0.5	1.5	0.333333
	M-89400	0	1	0.5	1.5	0.333333
	M-82411	0	1	0.5	1.5	0.333333
T-C1100	M-00100	0	1	0.5	1.5	0.333333
T-C4000	M-82403	0	1	0.5	1.5	0.333333
	M-80100	0	1	0.5	1.5	0.333333
	M-74320	0	1	0.5	1.5	0.333333
	M-67060	0	1	0.5	1.5	0.333333
	M-33430	0	1	0.5	1.5	0.333333
	F-C6040	0	1	0.5	1.5	0.333333
T-C1700	M-09410	0	1	0.5	1.5	0.333333
T-C1560	M-35100	0	1	0.5	1.5	0.333333
T-59450	M-81403	0	1	0.5	1.5	0.333333
T-01000	M-90903	0	1	0.5	1.5	0.333333
T-59450	F-39340	0	1	0.5	1.5	0.333333
T-02484	A-13510	0	1	0.5	1.5	0.333333
	M-87500	0	1	0.5	1.5	0.333333
T-02485	M-80520	0	1	0.5	1.5	0.333333
T-02486	M-80812	0	1	0.5	1.5	0.333333
T-02487	D0-01200	0	1	0.5	1.5	0.333333
	D0-22210	0	1	0.5	1.5	0.333333
	M-80520	0	1	0.5	1.5	0.333333
T-02805	D0-22250	0	1	0.5	1.5	0.333333
	D0-75610	0	1	0.5	1.5	0.333333
	M-80903	0	1	0.5	1.5	0.333333
	M-91200	0	1	0.5	1.5	0.333333
T-02820	D0-61000	0	1	0.5	1.5	0.333333
	M-72850	0	1	0.5	1.5	0.333333
	M-76810	0	1	0.5	1.5	0.333333
	M-78280	0	1	0.5	1.5	0.333333
	M-88300	0	1	0.5	1.5	0.333333
	M-88900	0	1	0.5	1.5	0.333333
T-02830	D0-00503	0	1	0.5	1.5	0.333333
	D0-10100	0	1	0.5	1.5	0.333333
	D0-10450	0	1	0.5	1.5	0.333333
T-02484	M-87270	0	1	0.5	1.5	0.333333
T-02480	M-91310	0	1	0.5	1.5	0.333333
T-02460	M-91200	0	1	0.5	1.5	0.333333
T-02480	M-80106	0	1	0.5	1.5	0.333333
T-02461	M-33400	0	1	0.5	1.5	0.333333
	M-80903	0	1	0.5	1.5	0.333333
	M-87500	0	1	0.5	1.5	0.333333
T-02462	M-87500	0	1	0.5	1.5	0.333333
	M-95600	0	1	0.5	1.5	0.333333
T-02471	D0-10410	0	1	0.5	1.5	0.333333
	D4-40500	0	1	0.5	1.5	0.333333
	M-44020	0	1	0.5	1.5	0.333333
	M-76600	0	1	0.5	1.5	0.333333
	M-87720	0	1	0.5	1.5	0.333333
	M-88510	0	1	0.5	1.5	0.333333
T-02480	D5-70200	0	1	0.5	1.5	0.333333
	DE-32A11	0	1	0.5	1.5	0.333333
	M-38000	0	1	0.5	1.5	0.333333
	M-41610	0	1	0.5	1.5	0.333333
	M-44020	0	1	0.5	1.5	0.333333
	M-72760	0	1	0.5	1.5	0.333333
	M-75530	0	1	0.5	1.5	0.333333
	M-78060	0	1	0.5	1.5	0.333333
T-02830	D0-90340	0	1	0.5	1.5	0.333333
	M-30400	0	1	0.5	1.5	0.333333
	M-37100	0	1	0.5	1.5	0.333333
	M-72860	0	1	0.5	1.5	0.333333
T-03000	M-79500	0	1	0.5	1.5	0.333333
	M-80010	0	1	0.5	1.5	0.333333
	M-80413	0	1	0.5	1.5	0.333333
	M-83900	0	1	0.5	1.5	0.333333
	M-85610	0	1	0.5	1.5	0.333333
	M-88503	0	1	0.5	1.5	0.333333
	M-89400	0	1	0.5	1.5	0.333333
	M-90840	0	1	0.5	1.5	0.333333
	M-99303	0	1	0.5	1.5	0.333333
T-04000	D7-90435	0	1	0.5	1.5	0.333333
	G-A497	0	1	0.5	1.5	0.333333
	M-04110	0	1	0.5	1.5	0.333333
	M-50140	0	1	0.5	1.5	0.333333
	M-55700	0	1	0.5	1.5	0.333333
	M-72150	0	1	0.5	1.5	0.333333
	M-72850	0	1	0.5	1.5	0.333333
	M-80001	0	1	0.5	1.5	0.333333
	M-80006	0	1	0.5	1.5	0.333333
	M-80011	0	1	0.5	1.5	0.333333
T-03000	M-55400	0	1	0.5	1.5	0.333333
	M-54020	0	1	0.5	1.5	0.333333
	M-44020	0	1	0.5	1.5	0.333333
T-02850	M-09350	0	1	0.5	1.5	0.333333
T-02830	M-76600	0	1	0.5	1.5	0.333333
	M-78280	0	1	0.5	1.5	0.333333
	M-87700	0	1	0.5	1.5	0.333333
T-02842	M-38000	0	1	0.5	1.5	0.333333
	M-76600	0	1	0.5	1.5	0.333333
	M-87270	0	1	0.5	1.5	0.333333
T-02850	D0-22100	0	1	0.5	1.5	0.333333
	G-A497	0	1	0.5	1.5	0.333333
	M-78280	0	1	0.5	1.5	0.333333
T-03000	M-41612	0	1	0.5	1.5	0.333333
T-02850	M-87203	0	1	0.5	1.5	0.333333
T-02870	M-88320	0	1	0.5	1.5	0.333333
	M-91200	0	1	0.5	1.5	0.333333
T-03000	M-09011	0	1	0.5	1.5	0.333333
	M-09300	0	1	0.5	1.5	0.333333
	M-24610	0	1	0.5	1.5	0.333333
	M-31510	0	1	0.5	1.5	0.333333
	M-32700	0	1	0.5	1.5	0.333333
T-02460	M-97003	0	1	0.5	1.5	0.333333
	M-87400	0	1	0.5	1.5	0.333333
T-04000	M-80203	0	1	0.5	1.5	0.333333
T-02120	D0-70030	0	1	0.5	1.5	0.333333
	M-22300	0	1	0.5	1.5	0.333333
	M-41610	0	1	0.5	1.5	0.333333
	M-44020	0	1	0.5	1.5	0.333333
	M-67060	0	1	0.5	1.5	0.333333
	M-81020	0	1	0.5	1.5	0.333333
	M-81100	0	1	0.5	1.5	0.333333
	M-82000	0	1	0.5	1.5	0.333333
	M-84070	0	1	0.5	1.5	0.333333
	M-88320	0	1	0.5	1.5	0.333333
	M-91310	0	1	0.5	1.5	0.333333
T-02130	DE-31A10	0	1	0.5	1.5	0.333333
	M-00100	0	1	0.5	1.5	0.333333
	M-44140	0	1	0.5	1.5	0.333333
	M-44200	0	1	0.5	1.5	0.333333
	M-62670	0	1	0.5	1.5	0.333333
	M-72920	0	1	0.5	1.5	0.333333
	M-87600	0	1	0.5	1.5	0.333333
	M-90840	0	1	0.5	1.5	0.333333
T-02140	D0-51150	0	1	0.5	1.5	0.333333
T-02120	M-09100	0	1	0.5	1.5	0.333333
	D0-51150	0	1	0.5	1.5	0.333333
T-02460	M-87203	0	1	0.5	1.5	0.333333
T-02120	D0-23010	0	1	0.5	1.5	0.333333
T-02100	M-80520	0	1	0.5	1.5	0.333333
	M-81100	0	1	0.5	1.5	0.333333
	M-84030	0	1	0.5	1.5	0.333333
	M-84060	0	1	0.5	1.5	0.333333
	M-87203	0	1	0.5	1.5	0.333333
	M-88301	0	1	0.5	1.5	0.333333
	M-88320	0	1	0.5	1.5	0.333333
	M-89400	0	1	0.5	1.5	0.333333
T-02102	D0-23012	0	1	0.5	1.5	0.333333
	M-44020	0	1	0.5	1.5	0.333333
	M-78280	0	1	0.5	1.5	0.333333
	M-87600	0	1	0.5	1.5	0.333333
	M-87800	0	1	0.5	1.5	0.333333
	M-88301	0	1	0.5	1.5	0.333333
	M-91200	0	1	0.5	1.5	0.333333
T-02104	D0-51150	0	1	0.5	1.5	0.333333
	M-72850	0	1	0.5	1.5	0.333333
	M-78280	0	1	0.5	1.5	0.333333
	M-87800	0	1	0.5	1.5	0.333333
T-02140	M-33401	0	1	0.5	1.5	0.333333
	M-67060	0	1	0.5	1.5	0.333333
	M-80943	0	1	0.5	1.5	0.333333
T-02150	M-10000	0	1	0.5	1.5	0.333333
T-02430	M-80706	0	1	0.5	1.5	0.333333
	M-80812	0	1	0.5	1.5	0.333333
	M-85003	0	1	0.5	1.5	0.333333
	M-87400	0	1	0.5	1.5	0.333333
T-02431	M-78060	0	1	0.5	1.5	0.333333
	M-80520	0	1	0.5	1.5	0.333333
T-02432	M-33410	0	1	0.5	1.5	0.333333
T-02450	D0-00564	0	1	0.5	1.5	0.333333
	D0-22250	0	1	0.5	1.5	0.333333
	M-41610	0	1	0.5	1.5	0.333333
	M-43000	0	1	0.5	1.5	0.333333
	M-57130	0	1	0.5	1.5	0.333333
	M-78730	0	1	0.5	1.5	0.333333
	M-80520	0	1	0.5	1.5	0.333333
	M-80703	0	1	0.5	1.5	0.333333
	M-84040	0	1	0.5	1.5	0.333333
	M-87720	0	1	0.5	1.5	0.333333
T-02460	M-09410	0	1	0.5	1.5	0.333333
	M-80903	0	1	0.5	1.5	0.333333
T-02430	M-78280	0	1	0.5	1.5	0.333333
	M-76810	0	1	0.5	1.5	0.333333
	M-74450	0	1	0.5	1.5	0.333333
T-02424	M-75540	0	1	0.5	1.5	0.333333
T-02400	M-72750	0	1	0.5	1.5	0.333333
T-02420	M-33401	0	1	0.5	1.5	0.333333
	M-40000	0	1	0.5	1.5	0.333333
	M-80520	0	1	0.5	1.5	0.333333
	M-80903	0	1	0.5	1.5	0.333333
T-02424	M-00110	0	1	0.5	1.5	0.333333
	M-33430	0	1	0.5	1.5	0.333333
	M-44020	0	1	0.5	1.5	0.333333
	M-76600	0	1	0.5	1.5	0.333333
T-02430	M-67060	0	1	0.5	1.5	0.333333
T-02424	M-78720	0	1	0.5	1.5	0.333333
	M-81403	0	1	0.5	1.5	0.333333
	M-84040	0	1	0.5	1.5	0.333333
	M-87203	0	1	0.5	1.5	0.333333
	M-87230	0	1	0.5	1.5	0.333333
	M-87400	0	1	0.5	1.5	0.333333
	M-95400	0	1	0.5	1.5	0.333333
T-02430	M-43000	0	1	0.5	1.5	0.333333
T-04000	M-80100	0	1	0.5	1.5	0.333333
	M-80600	0	1	0.5	1.5	0.333333
T-59440	M-67060	0	1	0.5	1.5	0.333333
T-24000	M-73000	0	1	0.5	1.5	0.333333
	M-80520	0	1	0.5	1.5	0.333333
T-24100	D2-04710	0	1	0.5	1.5	0.333333
	M-09010	0	1	0.5	1.5	0.333333
	M-26500	0	1	0.5	1.5	0.333333
	M-72000	0	1	0.5	1.5	0.333333
	M-74001	0	1	0.5	1.5	0.333333
	M-76820	0	1	0.5	1.5	0.333333
T-24110	M-72600	0	1	0.5	1.5	0.333333
T-24310	M-38000	0	1	0.5	1.5	0.333333
T-24400	M-09017	0	1	0.5	1.5	0.333333
	M-42000	0	1	0.5	1.5	0.333333
	M-78000	0	1	0.5	1.5	0.333333
	M-91200	0	1	0.5	1.5	0.333333
T-24410	M-74000	0	1	0.5	1.5	0.333333
	M-76810	0	1	0.5	1.5	0.333333
T-24420	M-01000	0	1	0.5	1.5	0.333333
	M-76800	0	1	0.5	1.5	0.333333
T-24440	M-09460	0	1	0.5	1.5	0.333333
T-24450	M-80703	0	1	0.5	1.5	0.333333
T-24000	M-74002	0	1	0.5	1.5	0.333333
	M-44000	0	1	0.5	1.5	0.333333
T-21000	M-82003	0	1	0.5	1.5	0.333333
T-24000	M-41000	0	1	0.5	1.5	0.333333
T-21000	M-87500	0	1	0.5	1.5	0.333333
	M-92620	0	1	0.5	1.5	0.333333
	M-97323	0	1	0.5	1.5	0.333333
T-21010	D2-02400	0	1	0.5	1.5	0.333333
	M-76800	0	1	0.5	1.5	0.333333
T-21130	M-41610	0	1	0.5	1.5	0.333333
	M-87500	0	1	0.5	1.5	0.333333
T-21180	M-80903	0	1	0.5	1.5	0.333333
T-21300	M-01000	0	1	0.5	1.5	0.333333
	M-38000	0	1	0.5	1.5	0.333333
	M-44020	0	1	0.5	1.5	0.333333
	M-76820	0	1	0.5	1.5	0.333333
	M-80703	0	1	0.5	1.5	0.333333
T-21340	M-38010	0	1	0.5	1.5	0.333333
	M-39210	0	1	0.5	1.5	0.333333
	M-40000	0	1	0.5	1.5	0.333333
	M-42100	0	1	0.5	1.5	0.333333
T-21360	M-80500	0	1	0.5	1.5	0.333333
	M-85503	0	1	0.5	1.5	0.333333
T-24471	M-44000	0	1	0.5	1.5	0.333333
T-24700	M-80703	0	1	0.5	1.5	0.333333
T-26000	D3-81670	0	1	0.5	1.5	0.333333
	M-36700	0	1	0.5	1.5	0.333333
T-28000	M-09460	0	1	0.5	1.5	0.333333
	M-33800	0	1	0.5	1.5	0.333333
	M-55000	0	1	0.5	1.5	0.333333
	M-75000	0	1	0.5	1.5	0.333333
	M-75610	0	1	0.5	1.5	0.333333
	M-77800	0	1	0.5	1.5	0.333333
	M-80109	0	1	0.5	1.5	0.333333
	M-81903	0	1	0.5	1.5	0.333333
	M-82003	0	1	0.5	1.5	0.333333
	M-96903	0	1	0.5	1.5	0.333333
T-28200	L-44130	0	1	0.5	1.5	0.333333
T-28400	M-81406	0	1	0.5	1.5	0.333333
T-28700	M-09460	0	1	0.5	1.5	0.333333
T-29000	D2-30700	0	1	0.5	1.5	0.333333
	M-30400	0	1	0.5	1.5	0.333333
	M-33900	0	1	0.5	1.5	0.333333
	M-67000	0	1	0.5	1.5	0.333333
	M-74100	0	1	0.5	1.5	0.333333
	M-77800	0	1	0.5	1.5	0.333333
T-28000	M-09150	0	1	0.5	1.5	0.333333
	M-03070	0	1	0.5	1.5	0.333333
	M-00110	0	1	0.5	1.5	0.333333
T-26000	M-87500	0	1	0.5	1.5	0.333333
	M-44210	0	1	0.5	1.5	0.333333
	M-45000	0	1	0.5	1.5	0.333333
	M-64000	0	1	0.5	1.5	0.333333
	M-74002	0	1	0.5	1.5	0.333333
	M-80009	0	1	0.5	1.5	0.333333
	M-80203	0	1	0.5	1.5	0.333333
	M-81406	0	1	0.5	1.5	0.333333
	M-82000	0	1	0.5	1.5	0.333333
	M-91203	0	1	0.5	1.5	0.333333
T-28000	M-00002	0	1	0.5	1.5	0.333333
T-26000	M-95900	0	1	0.5	1.5	0.333333
	M-96503	0	1	0.5	1.5	0.333333
	M-98233	0	1	0.5	1.5	0.333333
	MAC1P	0	1	0.5	1.5	0.333333
	MIC1	0	1	0.5	1.5	0.333333
T-26100	M-80123	0	1	0.5	1.5	0.333333
T-28000	D2-30700	0	1	0.5	1.5	0.333333
	DE-40200	0	1	0.5	1.5	0.333333
T-21000	M-83123	0	1	0.5	1.5	0.333333
	M-81211	0	1	0.5	1.5	0.333333
T-04000	M-81203	0	1	0.5	1.5	0.333333
T-04030	G-A469	0	1	0.5	1.5	0.333333
	M-33540	0	1	0.5	1.5	0.333333
	M-43000	0	1	0.5	1.5	0.333333
	M-54110	0	1	0.5	1.5	0.333333
	M-67021	0	1	0.5	1.5	0.333333
	M-72430	0	1	0.5	1.5	0.333333
	M-74320	0	1	0.5	1.5	0.333333
	M-80006	0	1	0.5	1.5	0.333333
	M-82003	0	1	0.5	1.5	0.333333
	M-82013	0	1	0.5	1.5	0.333333
	M-85403	0	1	0.5	1.5	0.333333
	M-85603	0	1	0.5	1.5	0.333333
	M-88500	0	1	0.5	1.5	0.333333
T-04040	M-71000	0	1	0.5	1.5	0.333333
T-04080	M-00110	0	1	0.5	1.5	0.333333
	M-85003	0	1	0.5	1.5	0.333333
T-11500	M-09000	0	1	0.5	1.5	0.333333
	M-09410	0	1	0.5	1.5	0.333333
	M-80103	0	1	0.5	1.5	0.333333
	M-88500	0	1	0.5	1.5	0.333333
T-04030	M-33401	0	1	0.5	1.5	0.333333
	D7-90150	0	1	0.5	1.5	0.333333
T-21000	M-81200	0	1	0.5	1.5	0.333333
T-04020	M-90203	0	1	0.5	1.5	0.333333
T-04000	M-82103	0	1	0.5	1.5	0.333333
	M-82503	0	1	0.5	1.5	0.333333
	M-84013	0	1	0.5	1.5	0.333333
	M-85060	0	1	0.5	1.5	0.333333
	M-87600	0	1	0.5	1.5	0.333333
	M-88320	0	1	0.5	1.5	0.333333
	M-88900	0	1	0.5	1.5	0.333333
	M-91803	0	1	0.5	1.5	0.333333
	M-92100	0	1	0.5	1.5	0.333333
	M-95003	0	1	0.5	1.5	0.333333
	MAC1D	0	1	0.5	1.5	0.333333
T-04020	G-A497	0	1	0.5	1.5	0.333333
	M-33410	0	1	0.5	1.5	0.333333
	M-41000	0	1	0.5	1.5	0.333333
	M-54110	0	1	0.5	1.5	0.333333
	M-67001	0	1	0.5	1.5	0.333333
	M-80106	0	1	0.5	1.5	0.333333
	M-84413	0	1	0.5	1.5	0.333333
	M-85032	0	1	0.5	1.5	0.333333
T-1A000	D1-50440	0	1	0.5	1.5	0.333333
	F-12101	0	1	0.5	1.5	0.333333
	F-39340	0	1	0.5	1.5	0.333333
	M-09010	0	1	0.5	1.5	0.333333
T-1A200	M-87110	0	1	0.5	1.5	0.333333
T-1A290	M-81903	0	1	0.5	1.5	0.333333
T-1A310	DC-90700	0	1	0.5	1.5	0.333333
T-1A325	M-40000	0	1	0.5	1.5	0.333333
T-1A400	M-09460	0	1	0.5	1.5	0.333333
T-1A700	M-50000	0	1	0.5	1.5	0.333333
	M-54010	0	1	0.5	1.5	0.333333
T-21000	M-00100	0	1	0.5	1.5	0.333333
	M-26500	0	1	0.5	1.5	0.333333
	M-44040	0	1	0.5	1.5	0.333333
	M-45000	0	1	0.5	1.5	0.333333
	M-67060	0	1	0.5	1.5	0.333333
	M-72850	0	1	0.5	1.5	0.333333
	M-74003	0	1	0.5	1.5	0.333333
	M-74100	0	1	0.5	1.5	0.333333
	M-76600	0	1	0.5	1.5	0.333333
	M-80503	0	1	0.5	1.5	0.333333
	M-80510	0	1	0.5	1.5	0.333333
	M-80943	0	1	0.5	1.5	0.333333
T-1A200	M-09350	0	1	0.5	1.5	0.333333
T-1A100	M-44140	0	1	0.5	1.5	0.333333
T-1A010	M-88610	0	1	0.5	1.5	0.333333
T-1A000	M-80106	0	1	0.5	1.5	0.333333
	M-26500	0	1	0.5	1.5	0.333333
	M-35061	0	1	0.5	1.5	0.333333
	M-50000	0	1	0.5	1.5	0.333333
	M-54010	0	1	0.5	1.5	0.333333
	M-54700	0	1	0.5	1.5	0.333333
	M-55100	0	1	0.5	1.5	0.333333
	M-55400	0	1	0.5	1.5	0.333333
	M-80043	0	1	0.5	1.5	0.333333
	M-81400	0	1	0.5	1.5	0.333333
T-1A010	M-00100	0	1	0.5	1.5	0.333333
T-1A000	M-87110	0	1	0.5	1.5	0.333333
	M-88211	0	1	0.5	1.5	0.333333
	M-91700	0	1	0.5	1.5	0.333333
	M-92200	0	1	0.5	1.5	0.333333
	M-92603	0	1	0.5	1.5	0.333333
	M-95913	0	1	0.5	1.5	0.333333
	M-97313	0	1	0.5	1.5	0.333333
	MIC3	0	1	0.5	1.5	0.333333
T-02100	D0-40100	0	1	0.5	1.5	0.333333
	D0-23010	0	1	0.5	1.5	0.333333
	D0-22250	0	1	0.5	1.5	0.333333
T-58000	D5-43140	0	1	0.5	1.5	0.333333
	D5-41404	0	1	0.5	1.5	0.333333
T-57600	M-76800	0	1	0.5	1.5	0.333333
	M-42100	0	1	0.5	1.5	0.333333
T-57400	L-13A00	0	1	0.5	1.5	0.333333
T-57000	M-95900	0	1	0.5	1.5	0.333333
	M-82630	0	1	0.5	1.5	0.333333
	M-80106	0	1	0.5	1.5	0.333333
	M-76820	0	1	0.5	1.5	0.333333
	M-76100	0	1	0.5	1.5	0.333333
	M-72850	0	1	0.5	1.5	0.333333
	M-72040	0	1	0.5	1.5	0.333333
	M-71000	0	1	0.5	1.5	0.333333
	M-43100	0	1	0.5	1.5	0.333333
	M-38350	0	1	0.5	1.5	0.333333
	M-35100	0	1	0.5	1.5	0.333333
	M-32000	0	1	0.5	1.5	0.333333
	M-30000	0	1	0.5	1.5	0.333333
	M-26000	0	1	0.5	1.5	0.333333
	M-09460	0	1	0.5	1.5	0.333333
T-58000	D5-42320	0	1	0.5	1.5	0.333333
	D5-70100	0	1	0.5	1.5	0.333333
T-58200	M-80500	0	1	0.5	1.5	0.333333
T-58000	DE-A1420	0	1	0.5	1.5	0.333333
T-58200	M-75300	0	1	0.5	1.5	0.333333
	M-58200	0	1	0.5	1.5	0.333333
	M-41500	0	1	0.5	1.5	0.333333
	M-39210	0	1	0.5	1.5	0.333333
	M-33400	0	1	0.5	1.5	0.333333
	M-20000	0	1	0.5	1.5	0.333333
	M-04000	0	1	0.5	1.5	0.333333
	DC-48400	0	1	0.5	1.5	0.333333
T-58000	M-95913	0	1	0.5	1.5	0.333333
	M-84603	0	1	0.5	1.5	0.333333
	M-84413	0	1	0.5	1.5	0.333333
	M-80003	0	1	0.5	1.5	0.333333
	M-76800	0	1	0.5	1.5	0.333333
	M-73000	0	1	0.5	1.5	0.333333
	M-41100	0	1	0.5	1.5	0.333333
	M-31430	0	1	0.5	1.5	0.333333
	M-31050	0	1	0.5	1.5	0.333333
	M-18800	0	1	0.5	1.5	0.333333
	G-A497	0	1	0.5	1.5	0.333333
T-57000	M-09011	0	1	0.5	1.5	0.333333
	L-10000	0	1	0.5	1.5	0.333333
	D5-47100	0	1	0.5	1.5	0.333333
	D5-41000	0	1	0.5	1.5	0.333333
T-54910	D5-10850	0	1	0.5	1.5	0.333333
	D5-10825	0	1	0.5	1.5	0.333333
	D5-10750	0	1	0.5	1.5	0.333333
T-54010	M-43000	0	1	0.5	1.5	0.333333
	M-39100	0	1	0.5	1.5	0.333333
T-54000	M-72000	0	1	0.5	1.5	0.333333
	M-41000	0	1	0.5	1.5	0.333333
T-53000	MIC3	0	1	0.5	1.5	0.333333
	M-95900	0	1	0.5	1.5	0.333333
	M-95800	0	1	0.5	1.5	0.333333
	M-95700	0	1	0.5	1.5	0.333333
	M-91600	0	1	0.5	1.5	0.333333
	M-88900	0	1	0.5	1.5	0.333333
	M-88100	0	1	0.5	1.5	0.333333
	M-82003	0	1	0.5	1.5	0.333333
	M-81403	0	1	0.5	1.5	0.333333
	M-81400	0	1	0.5	1.5	0.333333
	M-80003	0	1	0.5	1.5	0.333333
	M-55100	0	1	0.5	1.5	0.333333
T-54910	M-30400	0	1	0.5	1.5	0.333333
	M-74001	0	1	0.5	1.5	0.333333
	M-78060	0	1	0.5	1.5	0.333333
T-56000	M-72042	0	1	0.5	1.5	0.333333
T-56350	M-00100	0	1	0.5	1.5	0.333333
T-56210	D5-30100	0	1	0.5	1.5	0.333333
T-56000	T-56000	0	1	0.5	1.5	0.333333
	M-95800	0	1	0.5	1.5	0.333333
	M-91813	0	1	0.5	1.5	0.333333
	M-81703	0	1	0.5	1.5	0.333333
	M-80423	0	1	0.5	1.5	0.333333
	M-74470	0	1	0.5	1.5	0.333333
	M-72020	0	1	0.5	1.5	0.333333
T-54990	M-30400	0	1	0.5	1.5	0.333333
T-56000	M-67013	0	1	0.5	1.5	0.333333
	M-57000	0	1	0.5	1.5	0.333333
	M-44000	0	1	0.5	1.5	0.333333
	M-40750	0	1	0.5	1.5	0.333333
	M-30000	0	1	0.5	1.5	0.333333
	M-09150	0	1	0.5	1.5	0.333333
	L-36210	0	1	0.5	1.5	0.333333
	D5-20350	0	1	0.5	1.5	0.333333
T-58200	M-80000	0	1	0.5	1.5	0.333333
	M-80703	0	1	0.5	1.5	0.333333
T-01600	G-A568	0	1	0.5	1.5	0.333333
T-59300	M-76000	0	1	0.5	1.5	0.333333
	M-67000	0	1	0.5	1.5	0.333333
	M-44500	0	1	0.5	1.5	0.333333
	M-37001	0	1	0.5	1.5	0.333333
	M-34001	0	1	0.5	1.5	0.333333
	M-26000	0	1	0.5	1.5	0.333333
	M-18200	0	1	0.5	1.5	0.333333
	M-14100	0	1	0.5	1.5	0.333333
	M-14070	0	1	0.5	1.5	0.333333
	M-11660	0	1	0.5	1.5	0.333333
	M-10000	0	1	0.5	1.5	0.333333
	M-09300	0	1	0.5	1.5	0.333333
	M-09017	0	1	0.5	1.5	0.333333
	M-09000	0	1	0.5	1.5	0.333333
	M-01110	0	1	0.5	1.5	0.333333
	M-00001	0	1	0.5	1.5	0.333333
T-59200	M-84700	0	1	0.5	1.5	0.333333
	M-82403	0	1	0.5	1.5	0.333333
	M-79000	0	1	0.5	1.5	0.333333
	M-72042	0	1	0.5	1.5	0.333333
T-59300	M-72100	0	1	0.5	1.5	0.333333
	M-76100	0	1	0.5	1.5	0.333333
T-58200	MAC0	0	1	0.5	1.5	0.333333
T-59300	M-76801	0	1	0.5	1.5	0.333333
T-59440	M-00100	0	1	0.5	1.5	0.333333
T-59400	M-82443	0	1	0.5	1.5	0.333333
	M-72042	0	1	0.5	1.5	0.333333
	M-40000	0	1	0.5	1.5	0.333333
	M-38000	0	1	0.5	1.5	0.333333
	D5-44410	0	1	0.5	1.5	0.333333
T-04000	M-57500	0	1	0.5	1.5	0.333333
T-59300	T-01000	0	1	0.5	1.5	0.333333
	MIC3	0	1	0.5	1.5	0.333333
	M-96713	0	1	0.5	1.5	0.333333
	M-91000	0	1	0.5	1.5	0.333333
	M-90000	0	1	0.5	1.5	0.333333
	M-87413	0	1	0.5	1.5	0.333333
	M-84700	0	1	0.5	1.5	0.333333
	M-84100	0	1	0.5	1.5	0.333333
	M-82210	0	1	0.5	1.5	0.333333
	M-82102	0	1	0.5	1.5	0.333333
	M-81100	0	1	0.5	1.5	0.333333
	M-80706	0	1	0.5	1.5	0.333333
T-59200	M-57210	0	1	0.5	1.5	0.333333
	M-40630	0	1	0.5	1.5	0.333333
	M-33100	0	1	0.5	1.5	0.333333
	M-14400	0	1	0.5	1.5	0.333333
T-59000	M-09350	0	1	0.5	1.5	0.333333
	D5-41110	0	1	0.5	1.5	0.333333
T-58600	M-82630	0	1	0.5	1.5	0.333333
	M-82463	0	1	0.5	1.5	0.333333
	M-82403	0	1	0.5	1.5	0.333333
	M-80706	0	1	0.5	1.5	0.333333
	M-58000	0	1	0.5	1.5	0.333333
	M-50000	0	1	0.5	1.5	0.333333
	M-32701	0	1	0.5	1.5	0.333333
	M-32700	0	1	0.5	1.5	0.333333
	M-32000	0	1	0.5	1.5	0.333333
	M-14100	0	1	0.5	1.5	0.333333
	M-09010	0	1	0.5	1.5	0.333333
	D5-47200	0	1	0.5	1.5	0.333333
	D5-43010	0	1	0.5	1.5	0.333333
	D5-42320	0	1	0.5	1.5	0.333333
T-58400	M-89300	0	1	0.5	1.5	0.333333
	M-88900	0	1	0.5	1.5	0.333333
	M-09350	0	1	0.5	1.5	0.333333
T-59000	M-11620	0	1	0.5	1.5	0.333333
	M-37000	0	1	0.5	1.5	0.333333
	M-38000	0	1	0.5	1.5	0.333333
T-59100	G-A530	0	1	0.5	1.5	0.333333
T-59200	M-09010	0	1	0.5	1.5	0.333333
	M-01520	0	1	0.5	1.5	0.333333
	L-50000	0	1	0.5	1.5	0.333333
	D7-72142	0	1	0.5	1.5	0.333333
T-59100	M-82100	0	1	0.5	1.5	0.333333
	M-74000	0	1	0.5	1.5	0.333333
	M-54000	0	1	0.5	1.5	0.333333
	M-39210	0	1	0.5	1.5	0.333333
	F-39340	0	1	0.5	1.5	0.333333
T-59000	M-44000	0	1	0.5	1.5	0.333333
T-59100	D5-41000	0	1	0.5	1.5	0.333333
T-59000	M-81403	0	1	0.5	1.5	0.333333
	M-81400	0	1	0.5	1.5	0.333333
	M-76800	0	1	0.5	1.5	0.333333
	M-76600	0	1	0.5	1.5	0.333333
	M-74003	0	1	0.5	1.5	0.333333
	M-72000	0	1	0.5	1.5	0.333333
	M-57220	0	1	0.5	1.5	0.333333
T-53000	M-54110	0	1	0.5	1.5	0.333333
	M-54020	0	1	0.5	1.5	0.333333
	M-44000	0	1	0.5	1.5	0.333333
T-01000	M-33620	0	1	0.5	1.5	0.333333
	M-36100	0	1	0.5	1.5	0.333333
	M-38020	0	1	0.5	1.5	0.333333
	M-40006	0	1	0.5	1.5	0.333333
	M-40100	0	1	0.5	1.5	0.333333
	M-40700	0	1	0.5	1.5	0.333333
	M-41730	0	1	0.5	1.5	0.333333
	M-44210	0	1	0.5	1.5	0.333333
	M-45100	0	1	0.5	1.5	0.333333
	M-52100	0	1	0.5	1.5	0.333333
	M-54700	0	1	0.5	1.5	0.333333
	M-55410	0	1	0.5	1.5	0.333333
	M-58000	0	1	0.5	1.5	0.333333
	M-62670	0	1	0.5	1.5	0.333333
	M-67003	0	1	0.5	1.5	0.333333
	M-67017	0	1	0.5	1.5	0.333333
	M-72190	0	1	0.5	1.5	0.333333
	M-73200	0	1	0.5	1.5	0.333333
	M-74320	0	1	0.5	1.5	0.333333
	M-74430	0	1	0.5	1.5	0.333333
	M-33900	0	1	0.5	1.5	0.333333
	M-32750	0	1	0.5	1.5	0.333333
T-53000	M-36500	0	1	0.5	1.5	0.333333
T-01000	M-32220	0	1	0.5	1.5	0.333333
	D6-90100	0	1	0.5	1.5	0.333333
	D7-54100	0	1	0.5	1.5	0.333333
	D7-57110	0	1	0.5	1.5	0.333333
	D7-71660	0	1	0.5	1.5	0.333333
	D7-75960	0	1	0.5	1.5	0.333333
	DE-32000	0	1	0.5	1.5	0.333333
	DE-32110	0	1	0.5	1.5	0.333333
	DE-40700	0	1	0.5	1.5	0.333333
	DE-41000	0	1	0.5	1.5	0.333333
	DE-45750	0	1	0.5	1.5	0.333333
	G-A344	0	1	0.5	1.5	0.333333
	G-A632	0	1	0.5	1.5	0.333333
	L-43130	0	1	0.5	1.5	0.333333
	L-60052	0	1	0.5	1.5	0.333333
	M-00001	0	1	0.5	1.5	0.333333
	M-09400	0	1	0.5	1.5	0.333333
	M-14200	0	1	0.5	1.5	0.333333
	M-14700	0	1	0.5	1.5	0.333333
	M-22300	0	1	0.5	1.5	0.333333
	M-74450	0	1	0.5	1.5	0.333333
	M-75540	0	1	0.5	1.5	0.333333
	M-76070	0	1	0.5	1.5	0.333333
	M-76130	0	1	0.5	1.5	0.333333
	M-84010	0	1	0.5	1.5	0.333333
	M-85060	0	1	0.5	1.5	0.333333
	M-85203	0	1	0.5	1.5	0.333333
	M-86600	0	1	0.5	1.5	0.333333
	M-86800	0	1	0.5	1.5	0.333333
	M-87300	0	1	0.5	1.5	0.333333
	M-87303	0	1	0.5	1.5	0.333333
	M-87723	0	1	0.5	1.5	0.333333
	M-87803	0	1	0.5	1.5	0.333333
	M-88200	0	1	0.5	1.5	0.333333
	M-91000	0	1	0.5	1.5	0.333333
	M-91501	0	1	0.5	1.5	0.333333
	M-92200	0	1	0.5	1.5	0.333333
	M-95913	0	1	0.5	1.5	0.333333
	M-98000	0	1	0.5	1.5	0.333333
	M-98013	0	1	0.5	1.5	0.333333
	M-99701	0	1	0.5	1.5	0.333333
	MIC15	0	1	0.5	1.5	0.333333
	P2-00130	0	1	0.5	1.5	0.333333
	M-84003	0	1	0.5	1.5	0.333333
	M-83203	0	1	0.5	1.5	0.333333
	M-83123	0	1	0.5	1.5	0.333333
	M-79310	0	1	0.5	1.5	0.333333
	M-76770	0	1	0.5	1.5	0.333333
	M-76870	0	1	0.5	1.5	0.333333
	M-77880	0	1	0.5	1.5	0.333333
	M-78001	0	1	0.5	1.5	0.333333
	M-78250	0	1	0.5	1.5	0.333333
	M-78260	0	1	0.5	1.5	0.333333
	M-78280	0	1	0.5	1.5	0.333333
	M-78760	0	1	0.5	1.5	0.333333
	M-79320	0	1	0.5	1.5	0.333333
	M-82903	0	1	0.5	1.5	0.333333
	M-80010	0	1	0.5	1.5	0.333333
	M-80110	0	1	0.5	1.5	0.333333
	M-80523	0	1	0.5	1.5	0.333333
	M-80913	0	1	0.5	1.5	0.333333
	M-80960	0	1	0.5	1.5	0.333333
	M-81201	0	1	0.5	1.5	0.333333
	M-82403	0	1	0.5	1.5	0.333333
	M-82463	0	1	0.5	1.5	0.333333
	D6-40232	0	1	0.5	1.5	0.333333
	D5-45110	0	1	0.5	1.5	0.333333
	D4-B2011	0	1	0.5	1.5	0.333333
T-51004	M-38000	0	1	0.5	1.5	0.333333
T-51120	M-76810	0	1	0.5	1.5	0.333333
	M-74003	0	1	0.5	1.5	0.333333
	M-74001	0	1	0.5	1.5	0.333333
	M-00100	0	1	0.5	1.5	0.333333
	D0-10430	0	1	0.5	1.5	0.333333
T-51110	M-72000	0	1	0.5	1.5	0.333333
	M-38000	0	1	0.5	1.5	0.333333
T-51100	M-85503	0	1	0.5	1.5	0.333333
	M-81403	0	1	0.5	1.5	0.333333
	M-74000	0	1	0.5	1.5	0.333333
	M-67060	0	1	0.5	1.5	0.333333
	M-57200	0	1	0.5	1.5	0.333333
	M-38000	0	1	0.5	1.5	0.333333
	M-09350	0	1	0.5	1.5	0.333333
T-51004	M-95700	0	1	0.5	1.5	0.333333
	M-80520	0	1	0.5	1.5	0.333333
	M-76851	0	1	0.5	1.5	0.333333
	M-76850	0	1	0.5	1.5	0.333333
	M-74001	0	1	0.5	1.5	0.333333
T-51130	M-09350	0	1	0.5	1.5	0.333333
	M-38000	0	1	0.5	1.5	0.333333
	M-72600	0	1	0.5	1.5	0.333333
T-51300	M-80003	0	1	0.5	1.5	0.333333
T-53000	M-26500	0	1	0.5	1.5	0.333333
	M-24600	0	1	0.5	1.5	0.333333
	M-09300	0	1	0.5	1.5	0.333333
	DE-41000	0	1	0.5	1.5	0.333333
	D5-23180	0	1	0.5	1.5	0.333333
	D5-21670	0	1	0.5	1.5	0.333333
T-51600	M-72760	0	1	0.5	1.5	0.333333
T-51300	M-91200	0	1	0.5	1.5	0.333333
	M-32700	0	1	0.5	1.5	0.333333
T-51130	M-76800	0	1	0.5	1.5	0.333333
T-51300	M-04013	0	1	0.5	1.5	0.333333
	M-00100	0	1	0.5	1.5	0.333333
	D5-21670	0	1	0.5	1.5	0.333333
	D5-10780	0	1	0.5	1.5	0.333333
	D5-10750	0	1	0.5	1.5	0.333333
T-51200	M-41000	0	1	0.5	1.5	0.333333
	M-40000	0	1	0.5	1.5	0.333333
	M-33440	0	1	0.5	1.5	0.333333
T-51004	M-72850	0	1	0.5	1.5	0.333333
	M-33430	0	1	0.5	1.5	0.333333
T-01000	D2-01100	0	1	0.5	1.5	0.333333
T-51004	M-26500	0	1	0.5	1.5	0.333333
T-35400	M-54000	0	1	0.5	1.5	0.333333
	M-20000	0	1	0.5	1.5	0.333333
T-29000	M-96703	0	1	0.5	1.5	0.333333
	M-93500	0	1	0.5	1.5	0.333333
	M-91501	0	1	0.5	1.5	0.333333
	M-88900	0	1	0.5	1.5	0.333333
	M-87203	0	1	0.5	1.5	0.333333
	M-85800	0	1	0.5	1.5	0.333333
T-01000	D0-00524	0	1	0.5	1.5	0.333333
	D0-00543	0	1	0.5	1.5	0.333333
	D0-10230	0	1	0.5	1.5	0.333333
	D0-10410	0	1	0.5	1.5	0.333333
	D0-10423	0	1	0.5	1.5	0.333333
	D0-22162	0	1	0.5	1.5	0.333333
	D0-30140	0	1	0.5	1.5	0.333333
	D0-30160	0	1	0.5	1.5	0.333333
	D0-60100	0	1	0.5	1.5	0.333333
	D0-90342	0	1	0.5	1.5	0.333333
	D1-32020	0	1	0.5	1.5	0.333333
T-35400	M-55000	0	1	0.5	1.5	0.333333
	M-55100	0	1	0.5	1.5	0.333333
T-51000	D0-22310	0	1	0.5	1.5	0.333333
	M-78060	0	1	0.5	1.5	0.333333
T-51004	M-00100	0	1	0.5	1.5	0.333333
	D0-22210	0	1	0.5	1.5	0.333333
T-51000	T-74000	0	1	0.5	1.5	0.333333
	M-93100	0	1	0.5	1.5	0.333333
	M-92800	0	1	0.5	1.5	0.333333
	M-90840	0	1	0.5	1.5	0.333333
	M-87202	0	1	0.5	1.5	0.333333
	M-80000	0	1	0.5	1.5	0.333333
	M-76820	0	1	0.5	1.5	0.333333
	D5-20240	0	1	0.5	1.5	0.333333
	M-74300	0	1	0.5	1.5	0.333333
	M-72830	0	1	0.5	1.5	0.333333
	M-55100	0	1	0.5	1.5	0.333333
	M-41610	0	1	0.5	1.5	0.333333
	M-38020	0	1	0.5	1.5	0.333333
	M-36760	0	1	0.5	1.5	0.333333
	M-30000	0	1	0.5	1.5	0.333333
	M-09300	0	1	0.5	1.5	0.333333
T-04000	M-54700	0	1	0.5	1.5	0.333333
T-01000	D1-10250	0	1	0.5	1.5	0.333333
T-04000	M-78020	0	1	0.5	1.5	0.333333
T-51300	M-95900	0	1	0.5	1.5	0.333333
	M-26500	0	1	0.5	1.5	0.333333
T-51200	M-72000	0	1	0.5	1.5	0.333333
T-51130	M-09410	0	1	0.5	1.5	0.333333
T-51120	M-76800	0	1	0.5	1.5	0.333333
T-51110	M-44020	0	1	0.5	1.5	0.333333
T-51100	M-80000	0	1	0.5	1.5	0.333333
	M-78730	0	1	0.5	1.5	0.333333
	M-74003	0	1	0.5	1.5	0.333333
	M-09460	0	1	0.5	1.5	0.333333
T-51000	M-92100	0	1	0.5	1.5	0.333333
	M-84100	0	1	0.5	1.5	0.333333
	M-76700	0	1	0.5	1.5	0.333333
	M-76500	0	1	0.5	1.5	0.333333
	M-26000	0	1	0.5	1.5	0.333333
	D5-10750	0	1	0.5	1.5	0.333333
T-35400	M-40900	0	1	0.5	1.5	0.333333
T-29310	M-85800	0	1	0.5	1.5	0.333333
T-29200	M-44000	0	1	0.5	1.5	0.333333
T-29000	M-96903	0	1	0.5	1.5	0.333333
T-51300	M-72750	0	1	0.5	1.5	0.333333
T-53000	M-80510	0	1	0.5	1.5	0.333333
T-28800	M-81403	0	1	0.5	1.5	0.333333
T-54000	M-40000	0	1	0.5	1.5	0.333333
T-57010	D5-32500	0	1	0.5	1.5	0.333333
T-57000	M-88003	0	1	0.5	1.5	0.333333
	M-81503	0	1	0.5	1.5	0.333333
	M-39210	0	1	0.5	1.5	0.333333
	M-09420	0	1	0.5	1.5	0.333333
	D5-32520	0	1	0.5	1.5	0.333333
T-56000	M-87200	0	1	0.5	1.5	0.333333
	M-54700	0	1	0.5	1.5	0.333333
	M-31500	0	1	0.5	1.5	0.333333
	D5-41110	0	1	0.5	1.5	0.333333
	D5-30300	0	1	0.5	1.5	0.333333
	D4-55542	0	1	0.5	1.5	0.333333
T-54920	M-76810	0	1	0.5	1.5	0.333333
T-54910	M-95400	0	1	0.5	1.5	0.333333
	M-09410	0	1	0.5	1.5	0.333333
	M-09350	0	1	0.5	1.5	0.333333
T-54530	M-33400	0	1	0.5	1.5	0.333333
T-54010	M-92800	0	1	0.5	1.5	0.333333
T-54000	M-80000	0	1	0.5	1.5	0.333333
T-29000	D2-60682	0	1	0.5	1.5	0.333333
T-28600	M-80703	0	1	0.5	1.5	0.333333
T-57700	M-00100	0	1	0.5	1.5	0.333333
T-21130	M-78280	0	1	0.5	1.5	0.333333
T-21000	M-85503	0	1	0.5	1.5	0.333333
	M-80203	0	1	0.5	1.5	0.333333
	M-79600	0	1	0.5	1.5	0.333333
	M-73050	0	1	0.5	1.5	0.333333
	M-09300	0	1	0.5	1.5	0.333333
T-1A010	M-81403	0	1	0.5	1.5	0.333333
T-1A000	M-97323	0	1	0.5	1.5	0.333333
	M-95900	0	1	0.5	1.5	0.333333
	M-91730	0	1	0.5	1.5	0.333333
	M-88013	0	1	0.5	1.5	0.333333
	M-80413	0	1	0.5	1.5	0.333333
	M-55070	0	1	0.5	1.5	0.333333
	M-42100	0	1	0.5	1.5	0.333333
	M-42000	0	1	0.5	1.5	0.333333
T-11500	M-44000	0	1	0.5	1.5	0.333333
	M-09350	0	1	0.5	1.5	0.333333
	M-00100	0	1	0.5	1.5	0.333333
T-04080	M-80102	0	1	0.5	1.5	0.333333
T-04030	M-85202	0	1	0.5	1.5	0.333333
T-21130	M-40000	0	1	0.5	1.5	0.333333
T-21300	D2-02400	0	1	0.5	1.5	0.333333
T-28200	M-81403	0	1	0.5	1.5	0.333333
T-24000	M-43000	0	1	0.5	1.5	0.333333
T-28000	M-73000	0	1	0.5	1.5	0.333333
	M-67000	0	1	0.5	1.5	0.333333
	M-45000	0	1	0.5	1.5	0.333333
	M-26800	0	1	0.5	1.5	0.333333
T-26000	M-97323	0	1	0.5	1.5	0.333333
	M-91403	0	1	0.5	1.5	0.333333
	M-90533	0	1	0.5	1.5	0.333333
	M-82401	0	1	0.5	1.5	0.333333
	M-81903	0	1	0.5	1.5	0.333333
	M-55400	0	1	0.5	1.5	0.333333
	M-33960	0	1	0.5	1.5	0.333333
	DE-14800	0	1	0.5	1.5	0.333333
T-24455	M-74003	0	1	0.5	1.5	0.333333
T-24400	M-80103	0	1	0.5	1.5	0.333333
T-24320	M-33440	0	1	0.5	1.5	0.333333
T-24100	M-91200	0	1	0.5	1.5	0.333333
	M-36500	0	1	0.5	1.5	0.333333
	M-34000	0	1	0.5	1.5	0.333333
	D2-04700	0	1	0.5	1.5	0.333333
T-57600	M-41000	0	1	0.5	1.5	0.333333
T-57700	M-81403	0	1	0.5	1.5	0.333333
T-04030	M-42100	0	1	0.5	1.5	0.333333
T-71000	M-78060	0	1	0.5	1.5	0.333333
	M-52200	0	1	0.5	1.5	0.333333
	M-30000	0	1	0.5	1.5	0.333333
	F-CC330	0	1	0.5	1.5	0.333333
	F-62680	0	1	0.5	1.5	0.333333
	D7-14010	0	1	0.5	1.5	0.333333
	D3-02000	0	1	0.5	1.5	0.333333
T-65200	M-00100	0	1	0.5	1.5	0.333333
T-65000	M-80000	0	1	0.5	1.5	0.333333
T-64700	M-82413	0	1	0.5	1.5	0.333333
	M-09010	0	1	0.5	1.5	0.333333
T-64500	M-74001	0	1	0.5	1.5	0.333333
T-63000	M-81400	0	1	0.5	1.5	0.333333
	M-73000	0	1	0.5	1.5	0.333333
	M-45020	0	1	0.5	1.5	0.333333
	M-04000	0	1	0.5	1.5	0.333333
T-62000	M-75650	0	1	0.5	1.5	0.333333
T-61300	M-85623	0	1	0.5	1.5	0.333333
	M-81400	0	1	0.5	1.5	0.333333
T-61200	M-09410	0	1	0.5	1.5	0.333333
T-71000	M-67060	0	1	0.5	1.5	0.333333
T-71010	M-83123	0	1	0.5	1.5	0.333333
T-61100	M-95903	0	1	0.5	1.5	0.333333
T-71200	D7-12100	0	1	0.5	1.5	0.333333
T-83000	D7-75780	0	1	0.5	1.5	0.333333
T-81200	M-33400	0	1	0.5	1.5	0.333333
T-81020	M-45020	0	1	0.5	1.5	0.333333
T-81000	M-93813	0	1	0.5	1.5	0.333333
	M-72750	0	1	0.5	1.5	0.333333
	M-72020	0	1	0.5	1.5	0.333333
	M-43610	0	1	0.5	1.5	0.333333
	M-43060	0	1	0.5	1.5	0.333333
	D7-57130	0	1	0.5	1.5	0.333333
	D0-22214	0	1	0.5	1.5	0.333333
T-75000	M-72000	0	1	0.5	1.5	0.333333
T-74000	M-81213	0	1	0.5	1.5	0.333333
	M-80502	0	1	0.5	1.5	0.333333
	M-80203	0	1	0.5	1.5	0.333333
	M-78060	0	1	0.5	1.5	0.333333
	M-11600	0	1	0.5	1.5	0.333333
	M-00110	0	1	0.5	1.5	0.333333
	G-A425	0	1	0.5	1.5	0.333333
T-73000	M-09010	0	1	0.5	1.5	0.333333
T-61110	M-81400	0	1	0.5	1.5	0.333333
T-61100	M-78000	0	1	0.5	1.5	0.333333
T-58000	DE-32610	0	1	0.5	1.5	0.333333
T-59300	M-40006	0	1	0.5	1.5	0.333333
	G-A435	0	1	0.5	1.5	0.333333
T-59200	M-95700	0	1	0.5	1.5	0.333333
	M-82630	0	1	0.5	1.5	0.333333
	M-82463	0	1	0.5	1.5	0.333333
	D5-41000	0	1	0.5	1.5	0.333333
T-59000	M-88900	0	1	0.5	1.5	0.333333
T-58600	M-80103	0	1	0.5	1.5	0.333333
	M-34260	0	1	0.5	1.5	0.333333
T-58400	M-97173	0	1	0.5	1.5	0.333333
	M-39210	0	1	0.5	1.5	0.333333
T-58200	M-88500	0	1	0.5	1.5	0.333333
	M-80003	0	1	0.5	1.5	0.333333
	M-80001	0	1	0.5	1.5	0.333333
	M-54700	0	1	0.5	1.5	0.333333
	M-40100	0	1	0.5	1.5	0.333333
	G-A231	0	1	0.5	1.5	0.333333
	D6-94500	0	1	0.5	1.5	0.333333
	D5-32000	0	1	0.5	1.5	0.333333
T-58000	M-31850	0	1	0.5	1.5	0.333333
T-59300	M-02000	0	1	0.5	1.5	0.333333
	M-43750	0	1	0.5	1.5	0.333333
T-61000	M-80000	0	1	0.5	1.5	0.333333
T-59300	M-62100	0	1	0.5	1.5	0.333333
T-61000	D0-10100	0	1	0.5	1.5	0.333333
T-60610	M-09410	0	1	0.5	1.5	0.333333
T-59905	M-31050	0	1	0.5	1.5	0.333333
T-59900	M-80500	0	1	0.5	1.5	0.333333
T-59680	M-42000	0	1	0.5	1.5	0.333333
T-59600	M-82411	0	1	0.5	1.5	0.333333
	M-80106	0	1	0.5	1.5	0.333333
	M-76810	0	1	0.5	1.5	0.333333
	G-A425	0	1	0.5	1.5	0.333333
	G-A001	0	1	0.5	1.5	0.333333
T-59470	D5-43202	0	1	0.5	1.5	0.333333
T-59440	M-76800	0	1	0.5	1.5	0.333333
T-59400	M-18200	0	1	0.5	1.5	0.333333
	M-00100	0	1	0.5	1.5	0.333333
	D5-41000	0	1	0.5	1.5	0.333333
T-59300	M-95913	0	1	0.5	1.5	0.333333
	M-91403	0	1	0.5	1.5	0.333333
	M-82600	0	1	0.5	1.5	0.333333
	M-80413	0	1	0.5	1.5	0.333333
T-04030	M-73310	0	1	0.5	1.5	0.333333
	C-22301	0	1	0.5	1.5	0.333333
T-87000	M-83811	0	1	0.5	1.5	0.333333
T-C4000	M-84413	0	1	0.5	1.5	0.333333
	M-79000	0	1	0.5	1.5	0.333333
	M-33400	0	1	0.5	1.5	0.333333
	G-A425	0	1	0.5	1.5	0.333333
T-C1003	M-81406	0	1	0.5	1.5	0.333333
T-C1000	M-98203	0	1	0.5	1.5	0.333333
	M-80703	0	1	0.5	1.5	0.333333
	M-79000	0	1	0.5	1.5	0.333333
	M-55100	0	1	0.5	1.5	0.333333
	M-43060	0	1	0.5	1.5	0.333333
	M-09000	0	1	0.5	1.5	0.333333
	M-00001	0	1	0.5	1.5	0.333333
	DC-36130	0	1	0.5	1.5	0.333333
	C-00102	0	1	0.5	1.5	0.333333
T-B6600	M-40000	0	1	0.5	1.5	0.333333
T-B6000	M-85113	0	1	0.5	1.5	0.333333
	M-69000	0	1	0.5	1.5	0.333333
	M-44000	0	1	0.5	1.5	0.333333
	M-42000	0	1	0.5	1.5	0.333333
	M-35000	0	1	0.5	1.5	0.333333
T-C4000	M-83103	0	1	0.5	1.5	0.333333
	M-87200	0	1	0.5	1.5	0.333333
T-B6000	D6-94800	0	1	0.5	1.5	0.333333
T-C4000	MIC1	0	1	0.5	1.5	0.333333
T-C5100	M-70000	0	1	0.5	1.5	0.333333
	M-54010	0	1	0.5	1.5	0.333333
T-C5000	M-80500	0	1	0.5	1.5	0.333333
	M-45020	0	1	0.5	1.5	0.333333
	M-40000	0	1	0.5	1.5	0.333333
	M-09460	0	1	0.5	1.5	0.333333
	G-A497	0	1	0.5	1.5	0.333333
T-C4900	M-09350	0	1	0.5	1.5	0.333333
T-C4810	M-80706	0	1	0.5	1.5	0.333333
	M-72200	0	1	0.5	1.5	0.333333
	G-A497	0	1	0.5	1.5	0.333333
T-C4710	M-95203	0	1	0.5	1.5	0.333333
	M-80013	0	1	0.5	1.5	0.333333
	M-67060	0	1	0.5	1.5	0.333333
	D7-90434	0	1	0.5	1.5	0.333333
T-C4480	M-80106	0	1	0.5	1.5	0.333333
T-C4400	M-80703	0	1	0.5	1.5	0.333333
T-C4200	M-80106	0	1	0.5	1.5	0.333333
	M-09350	0	1	0.5	1.5	0.333333
T-B6000	DB-80000	0	1	0.5	1.5	0.333333
T-AA000	MIC1	0	1	0.5	1.5	0.333333
T-C5300	M-72020	0	1	0.5	1.5	0.333333
T-94000	M-20000	0	1	0.5	1.5	0.333333
T-92000	M-93500	0	1	0.5	1.5	0.333333
	M-87403	0	1	0.5	1.5	0.333333
	M-81903	0	1	0.5	1.5	0.333333
	M-72500	0	1	0.5	1.5	0.333333
	M-72005	0	1	0.5	1.5	0.333333
	M-30000	0	1	0.5	1.5	0.333333
T-87800	D7-75120	0	1	0.5	1.5	0.333333
T-87020	M-81403	0	1	0.5	1.5	0.333333
	M-00100	0	1	0.5	1.5	0.333333
T-87010	M-84400	0	1	0.5	1.5	0.333333
	M-80103	0	1	0.5	1.5	0.333333
	M-79690	0	1	0.5	1.5	0.333333
	M-43610	0	1	0.5	1.5	0.333333
T-87000	M-95903	0	1	0.5	1.5	0.333333
	M-89320	0	1	0.5	1.5	0.333333
	M-87710	0	1	0.5	1.5	0.333333
	M-87400	0	1	0.5	1.5	0.333333
	M-86000	0	1	0.5	1.5	0.333333
	M-84503	0	1	0.5	1.5	0.333333
T-94000	M-10460	0	1	0.5	1.5	0.333333
	M-24640	0	1	0.5	1.5	0.333333
T-AA000	M-80520	0	1	0.5	1.5	0.333333
T-94000	M-35000	0	1	0.5	1.5	0.333333
T-AA000	M-44000	0	1	0.5	1.5	0.333333
	M-33440	0	1	0.5	1.5	0.333333
	M-01000	0	1	0.5	1.5	0.333333
	M-00110	0	1	0.5	1.5	0.333333
	DA-76130	0	1	0.5	1.5	0.333333
	DA-75722	0	1	0.5	1.5	0.333333
T-94400	M-75000	0	1	0.5	1.5	0.333333
	M-36000	0	1	0.5	1.5	0.333333
	D7-54100	0	1	0.5	1.5	0.333333
T-94020	DE-14800	0	1	0.5	1.5	0.333333
T-94000	M-90823	0	1	0.5	1.5	0.333333
	M-90801	0	1	0.5	1.5	0.333333
	M-90540	0	1	0.5	1.5	0.333333
	M-86500	0	1	0.5	1.5	0.333333
	M-80010	0	1	0.5	1.5	0.333333
	M-73500	0	1	0.5	1.5	0.333333
	M-42000	0	1	0.5	1.5	0.333333
	M-36100	0	1	0.5	1.5	0.333333
	M-35060	0	1	0.5	1.5	0.333333
T-C5100	M-78003	0	1	0.5	1.5	0.333333
T-D2700	D7-75920	0	1	0.5	1.5	0.333333
T-04020	M-82013	0	1	0.5	1.5	0.333333
T-02842	M-87600	0	1	0.5	1.5	0.333333
T-02820	M-80703	0	1	0.5	1.5	0.333333
	D0-22250	0	1	0.5	1.5	0.333333
T-02480	M-91700	0	1	0.5	1.5	0.333333
	M-57210	0	1	0.5	1.5	0.333333
T-02471	M-40000	0	1	0.5	1.5	0.333333
T-02460	M-33400	0	1	0.5	1.5	0.333333
	D0-22210	0	1	0.5	1.5	0.333333
T-02450	M-95400	0	1	0.5	1.5	0.333333
T-02432	M-33401	0	1	0.5	1.5	0.333333
T-02430	M-87202	0	1	0.5	1.5	0.333333
	M-45020	0	1	0.5	1.5	0.333333
	M-09410	0	1	0.5	1.5	0.333333
T-02420	M-33430	0	1	0.5	1.5	0.333333
T-02400	M-87600	0	1	0.5	1.5	0.333333
T-02140	M-72860	0	1	0.5	1.5	0.333333
	M-44020	0	1	0.5	1.5	0.333333
T-02130	M-40000	0	1	0.5	1.5	0.333333
T-02120	M-87270	0	1	0.5	1.5	0.333333
	D0-61000	0	1	0.5	1.5	0.333333
T-02820	M-80812	0	1	0.5	1.5	0.333333
T-02842	M-88320	0	1	0.5	1.5	0.333333
T-01000	M-80900	0	1	0.5	1.5	0.333333
T-02850	M-88510	0	1	0.5	1.5	0.333333
T-04020	D7-90364	0	1	0.5	1.5	0.333333
T-04000	M-85403	0	1	0.5	1.5	0.333333
	M-83123	0	1	0.5	1.5	0.333333
	M-81406	0	1	0.5	1.5	0.333333
	M-80530	0	1	0.5	1.5	0.333333
	M-58002	0	1	0.5	1.5	0.333333
	M-09012	0	1	0.5	1.5	0.333333
	M-09011	0	1	0.5	1.5	0.333333
	D7-90360	0	1	0.5	1.5	0.333333
T-03000	M-97323	0	1	0.5	1.5	0.333333
	M-91710	0	1	0.5	1.5	0.333333
	M-90203	0	1	0.5	1.5	0.333333
	M-88023	0	1	0.5	1.5	0.333333
	M-81400	0	1	0.5	1.5	0.333333
	M-44700	0	1	0.5	1.5	0.333333
	M-44500	0	1	0.5	1.5	0.333333
	M-39300	0	1	0.5	1.5	0.333333
	M-24640	0	1	0.5	1.5	0.333333
	D6-34750	0	1	0.5	1.5	0.333333
T-02102	M-80323	0	1	0.5	1.5	0.333333
T-01000	M-80763	0	1	0.5	1.5	0.333333
T-D2700	M-09410	0	1	0.5	1.5	0.333333
T-01000	D0-10130	0	1	0.5	1.5	0.333333
T-D4600	M-80013	0	1	0.5	1.5	0.333333
	M-76500	0	1	0.5	1.5	0.333333
	M-33680	0	1	0.5	1.5	0.333333
	M-01000	0	1	0.5	1.5	0.333333
	D8-02000	0	1	0.5	1.5	0.333333
T-D4400	M-89303	0	1	0.5	1.5	0.333333
	M-73000	0	1	0.5	1.5	0.333333
	M-42000	0	1	0.5	1.5	0.333333
	M-33980	0	1	0.5	1.5	0.333333
	D7-75626	0	1	0.5	1.5	0.333333
T-D3050	M-95903	0	1	0.5	1.5	0.333333
	M-95900	0	1	0.5	1.5	0.333333
T-D2701	M-37000	0	1	0.5	1.5	0.333333
	M-09350	0	1	0.5	1.5	0.333333
	DE-32A20	0	1	0.5	1.5	0.333333
T-D2700	M-76810	0	1	0.5	1.5	0.333333
	M-45020	0	1	0.5	1.5	0.333333
	M-41610	0	1	0.5	1.5	0.333333
	M-33400	0	1	0.5	1.5	0.333333
T-D4600	M-84613	0	1	0.5	1.5	0.333333
T-01000	D0-10420	0	1	0.5	1.5	0.333333
	M-80530	0	1	0.5	1.5	0.333333
	D0-22212	0	1	0.5	1.5	0.333333
	M-78810	0	1	0.5	1.5	0.333333
	M-76860	0	1	0.5	1.5	0.333333
	M-76801	0	1	0.5	1.5	0.333333
	M-74470	0	1	0.5	1.5	0.333333
	M-72570	0	1	0.5	1.5	0.333333
	M-71450	0	1	0.5	1.5	0.333333
	M-67020	0	1	0.5	1.5	0.333333
	M-62500	0	1	0.5	1.5	0.333333
	M-57170	0	1	0.5	1.5	0.333333
	M-55070	0	1	0.5	1.5	0.333333
	M-54720	0	1	0.5	1.5	0.333333
	M-44070	0	1	0.5	1.5	0.333333
	M-37003	0	1	0.5	1.5	0.333333
	M-36730	0	1	0.5	1.5	0.333333
	D8-00190	0	1	0.5	1.5	0.333333
	D7-72160	0	1	0.5	1.5	0.333333
	D7-12419	0	1	0.5	1.5	0.333333
T-04000	M-79000	0	1	0.5	1.5	0.333333
T-01000	D0-70150	0	1	0.5	1.5	0.333333
T-83000	D7-75920	0	1	0.5	1.5	0.333333
	D8-04100	0	1	0.5	1.5	0.333333
	M-33600	0	1	0.5	1.5	0.333333
T-81000	M-35100	0	1	0.5	1.5	0.333333
T-59600	M-26710	0	1	0.5	1.5	0.333333
T-26000	M-40210	0	1	0.5	1.5	0.333333
T-59600	D5-45420	0	1	0.5	1.5	0.333333
T-83400	M-76100	0	1	0.5	1.5	0.333333
T-02842	M-80703	0	1	0.5	1.5	0.333333
T-59990	M-76810	0	1	0.5	1.5	0.333333
T-C4810	M-95903	0	1	0.5	1.5	0.333333
T-59300	F-62840	0	1	0.5	1.5	0.333333
T-54910	D5-21670	0	1	0.5	1.5	0.333333
T-01000	DA-76832	0	1	0.5	1.5	0.333333
	M-85403	0	1	0.5	1.5	0.333333
T-54010	M-72600	0	1	0.5	1.5	0.333333
T-B6200	DB-80140	0	1	0.5	1.5	0.333333
T-51000	L-10800	0	1	0.5	1.5	0.333333
T-87000	M-82403	0	1	0.5	1.5	0.333333
T-1A000	D4-40500	0	1	0.5	1.5	0.333333
T-83400	M-79460	0	1	0.5	1.5	0.333333
T-24400	M-80102	0	1	0.5	1.5	0.333333
T-1A000	M-85803	0	1	0.5	1.5	0.333333
T-02450	M-33410	0	1	0.5	1.5	0.333333
T-51120	M-40000	0	1	0.5	1.5	0.333333
T-02430	M-09017	0	1	0.5	1.5	0.333333
T-83000	M-35000	0	1	0.5	1.5	0.333333
T-04030	M-84413	0	1	0.5	1.5	0.333333
T-02120	DC-72210	0	1	0.5	1.5	0.333333
T-58400	M-38000	0	1	0.5	1.5	0.333333
T-02850	M-72850	0	1	0.5	1.5	0.333333
T-71000	M-97323	0	1	0.5	1.5	0.333333
T-04030	M-81400	0	1	0.5	1.5	0.333333
T-57000	M-58000	0	1	0.5	1.5	0.333333
T-71020	M-83123	0	1	0.5	1.5	0.333333
T-71010	M-37001	0	1	0.5	1.5	0.333333
T-02850	M-09010	0	1	0.5	1.5	0.333333
T-02485	M-80812	0	1	0.5	1.5	0.333333
T-02424	M-91210	0	1	0.5	1.5	0.333333
T-02830	M-87433	0	1	0.5	1.5	0.333333
T-02120	D0-30126	0	1	0.5	1.5	0.333333
T-57000	D5-41110	0	1	0.5	1.5	0.333333
T-83400	M-89900	0	1	0.5	1.5	0.333333
T-D3050	M-09350	0	1	0.5	1.5	0.333333
T-56000	M-09420	0	1	0.5	1.5	0.333333
T-01000	M-80303	0	1	0.5	1.5	0.333333
T-83000	M-84410	0	1	0.5	1.5	0.333333
T-04000	M-74300	0	1	0.5	1.5	0.333333
T-01000	D0-75100	0	1	0.5	1.5	0.333333
T-C4000	L-21801	0	1	0.5	1.5	0.333333
T-02150	M-72920	0	1	0.5	1.5	0.333333
T-59470	M-31500	0	1	0.5	1.5	0.333333
T-02431	M-72750	0	1	0.5	1.5	0.333333
T-74000	M-93000	0	1	0.5	1.5	0.333333
T-04030	G-A497	0	1	0.5	1.5	0.333333
T-59300	M-50100	0	1	0.5	1.5	0.333333
T-73020	M-43000	0	1	0.5	1.5	0.333333
T-59300	F-62B02	0	1	0.5	1.5	0.333333
T-64000	M-67000	0	1	0.5	1.5	0.333333
T-C4000	M-93000	0	1	0.5	1.5	0.333333
T-24320	M-43000	0	1	0.5	1.5	0.333333
T-87000	M-54800	0	1	0.5	1.5	0.333333
T-87800	M-84700	0	1	0.5	1.5	0.333333
T-03000	M-80006	0	1	0.5	1.5	0.333333
T-D4600	M-45020	0	1	0.5	1.5	0.333333
T-21180	M-84500	0	1	0.5	1.5	0.333333
T-59300	M-57740	0	1	0.5	1.5	0.333333
T-83400	T-F0000	0	1	0.5	1.5	0.333333
T-51100	M-76850	0	1	0.5	1.5	0.333333
T-C4000	M-09011	0	1	0.5	1.5	0.333333
T-01000	M-75400	0	1	0.5	1.5	0.333333
T-C4900	G-A497	0	1	0.5	1.5	0.333333
T-B6200	M-09410	0	1	0.5	1.5	0.333333
T-62000	M-42000	0	1	0.5	1.5	0.333333
T-58600	M-18800	0	1	0.5	1.5	0.333333
T-02480	M-09012	0	1	0.5	1.5	0.333333
T-81000	M-80713	0	1	0.5	1.5	0.333333
T-1A000	M-44020	0	1	0.5	1.5	0.333333
T-26000	M-33201	0	1	0.5	1.5	0.333333
T-01000	M-70000	0	1	0.5	1.5	0.333333
T-C4350	M-85803	0	1	0.5	1.5	0.333333
T-57000	M-20000	0	1	0.5	1.5	0.333333
T-D4600	G-A001	0	1	0.5	1.5	0.333333
T-02424	M-41610	0	1	0.5	1.5	0.333333
T-71000	M-89300	0	1	0.5	1.5	0.333333
T-83000	M-37001	0	1	0.5	1.5	0.333333
T-87000	M-78000	0	1	0.5	1.5	0.333333
T-59100	M-43000	0	1	0.5	1.5	0.333333
T-C4000	M-44700	0	1	0.5	1.5	0.333333
T-74000	G-A112	0	1	0.5	1.5	0.333333
T-C1000	M-98300	0	1	0.5	1.5	0.333333
T-C5000	M-98233	0	1	0.5	1.5	0.333333
T-56000	M-73220	0	1	0.5	1.5	0.333333
T-59990	M-41000	0	1	0.5	1.5	0.333333
T-83000	M-58050	0	1	0.5	1.5	0.333333
T-24320	M-74002	0	1	0.5	1.5	0.333333
T-74000	M-01000	0	1	0.5	1.5	0.333333
T-83000	M-79300	0	1	0.5	1.5	0.333333
T-51110	M-43000	0	1	0.5	1.5	0.333333
T-59680	M-81403	0	1	0.5	1.5	0.333333
T-C4000	M-90801	0	1	0.5	1.5	0.333333
T-71200	D7-12150	0	1	0.5	1.5	0.333333
T-C1000	M-09460	0	1	0.5	1.5	0.333333
T-74000	M-67040	0	1	0.5	1.5	0.333333
T-01000	M-76890	0	1	0.5	1.5	0.333333
T-04000	M-32000	0	1	0.5	1.5	0.333333
T-02480	M-80812	0	1	0.5	1.5	0.333333
T-21180	M-80703	0	1	0.5	1.5	0.333333
T-01000	M-36320	0	1	0.5	1.5	0.333333
T-87800	DB-21500	0	1	0.5	1.5	0.333333
T-04000	D0-10100	0	1	0.5	1.5	0.333333
T-24400	M-43300	0	1	0.5	1.5	0.333333
T-03000	M-97313	0	1	0.5	1.5	0.333333
T-01000	M-72830	0	1	0.5	1.5	0.333333
T-61000	M-38000	0	1	0.5	1.5	0.333333
	M-39300	0	1	0.5	1.5	0.333333
T-D4400	M-82413	0	1	0.5	1.5	0.333333
T-02471	M-33430	0	1	0.5	1.5	0.333333
T-02850	M-87600	0	1	0.5	1.5	0.333333
T-AA000	M-00100	0	1	0.5	1.5	0.333333
T-02424	M-38000	0	1	0.5	1.5	0.333333
T-02487	M-33170	0	1	0.5	1.5	0.333333
T-C1000	M-67003	0	1	0.5	1.5	0.333333
T-71000	M-93643	0	1	0.5	1.5	0.333333
T-C5100	T-72000	0	1	0.5	1.5	0.333333
T-56000	M-32700	0	1	0.5	1.5	0.333333
T-29000	M-09410	0	1	0.5	1.5	0.333333
T-02471	D0-22250	0	1	0.5	1.5	0.333333
T-03000	M-34000	0	1	0.5	1.5	0.333333
T-92000	M-88003	0	1	0.5	1.5	0.333333
T-83000	F-62580	0	1	0.5	1.5	0.333333
T-03000	M-73000	0	1	0.5	1.5	0.333333
T-24400	D2-04710	0	1	0.5	1.5	0.333333
T-62000	M-55400	0	1	0.5	1.5	0.333333
T-03000	M-84603	0	1	0.5	1.5	0.333333
T-58200	L-52400	0	1	0.5	1.5	0.333333
T-D4400	M-72000	0	1	0.5	1.5	0.333333
T-02430	M-81403	0	1	0.5	1.5	0.333333
T-02462	M-09350	0	1	0.5	1.5	0.333333
T-01000	D0-00502	0	1	0.5	1.5	0.333333
T-87020	M-90803	0	1	0.5	1.5	0.333333
T-87800	M-84623	0	1	0.5	1.5	0.333333
T-AA910	M-81402	0	1	0.5	1.5	0.333333
T-74000	M-62510	0	1	0.5	1.5	0.333333
T-02842	M-45020	0	1	0.5	1.5	0.333333
T-58600	D5-41110	0	1	0.5	1.5	0.333333
T-C5100	M-45020	0	1	0.5	1.5	0.333333
T-28000	M-80203	0	1	0.5	1.5	0.333333
T-58000	M-72040	0	1	0.5	1.5	0.333333
T-D2700	M-80001	0	1	0.5	1.5	0.333333
T-26000	M-73300	0	1	0.5	1.5	0.333333
T-81000	D0-10100	0	1	0.5	1.5	0.333333
T-51200	M-30000	0	1	0.5	1.5	0.333333
T-64400	M-87200	0	1	0.5	1.5	0.333333
T-65000	D5-80600	0	1	0.5	1.5	0.333333
T-C5300	M-87000	0	1	0.5	1.5	0.333333
T-C4000	M-30400	0	1	0.5	1.5	0.333333
T-02102	M-73400	0	1	0.5	1.5	0.333333
T-58400	M-79310	0	1	0.5	1.5	0.333333
T-59300	M-35100	0	1	0.5	1.5	0.333333
[truncated: 3,549 more rows]
